# Supplementary material
Source: PubMed Central journal article supplement (PMC4395467)

# MSMS Protein Single Report

**Source:** D:/Data/Petersen/013113/Fritz #11\_Tray02-F2\_01\_640.d  
**Protein:** 78 kDa glucose-regulated protein OS=Homo sapiens GN=HSPA5 PE=1 SV=2  
**Accession:** GRP78\_HUMAN **Parent m/z:** 835.44, 3+  
**Sequence:** R.LIGDAAKNQLTSPENTVFDK.R **Score:** 35.57

**Modification:** HNE+Delta:H(2): 7

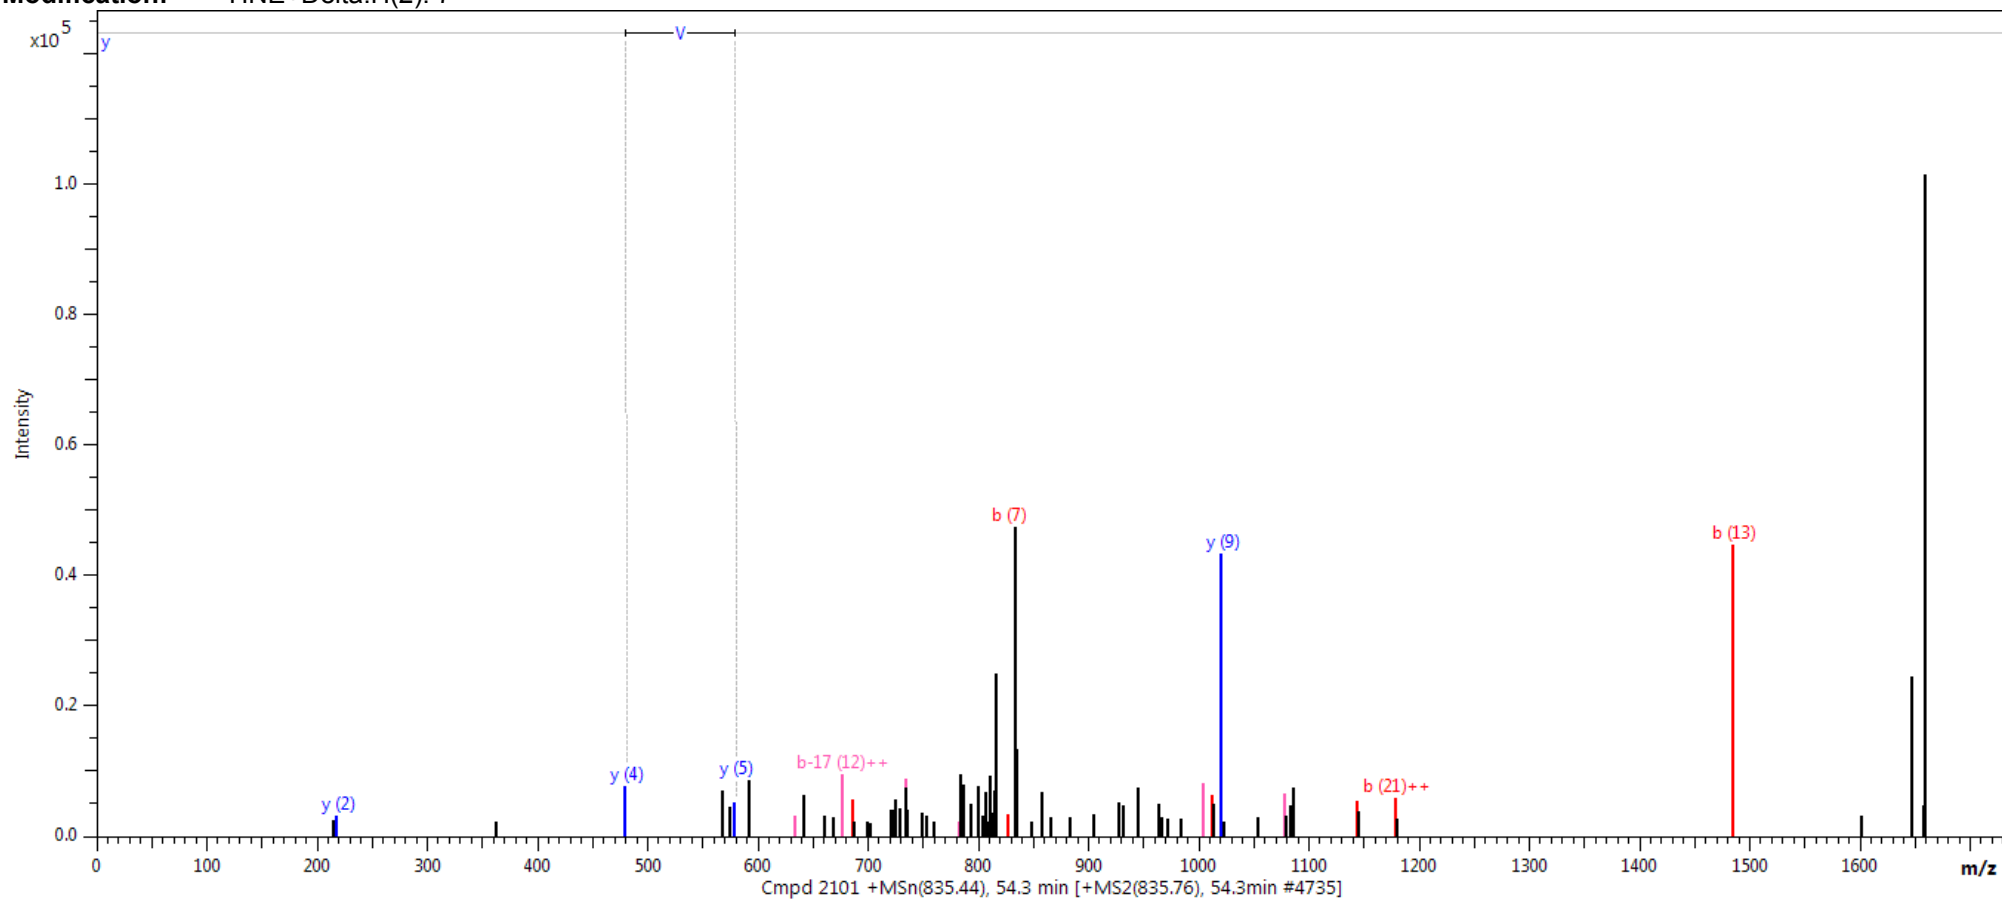

# MSMS Protein Single Report

**Source:** D:/Data/Petersen/013113/Fritz #9\_Tray02-E9\_01\_638.d  
**Protein:** 78 kDa glucose-regulated protein OS=Homo sapiens GN=HSPA5 PE=1 SV=2  
**Accession:** GRP78\_HUMAN **Parent m/z:** 828.1, 3+  
**Sequence:** R.LIGDAAKNQLTSPENTVFDK.R **Score:** 25.46

**Modification:** 4-ONE+Delta:H(-2)O(-1): 7

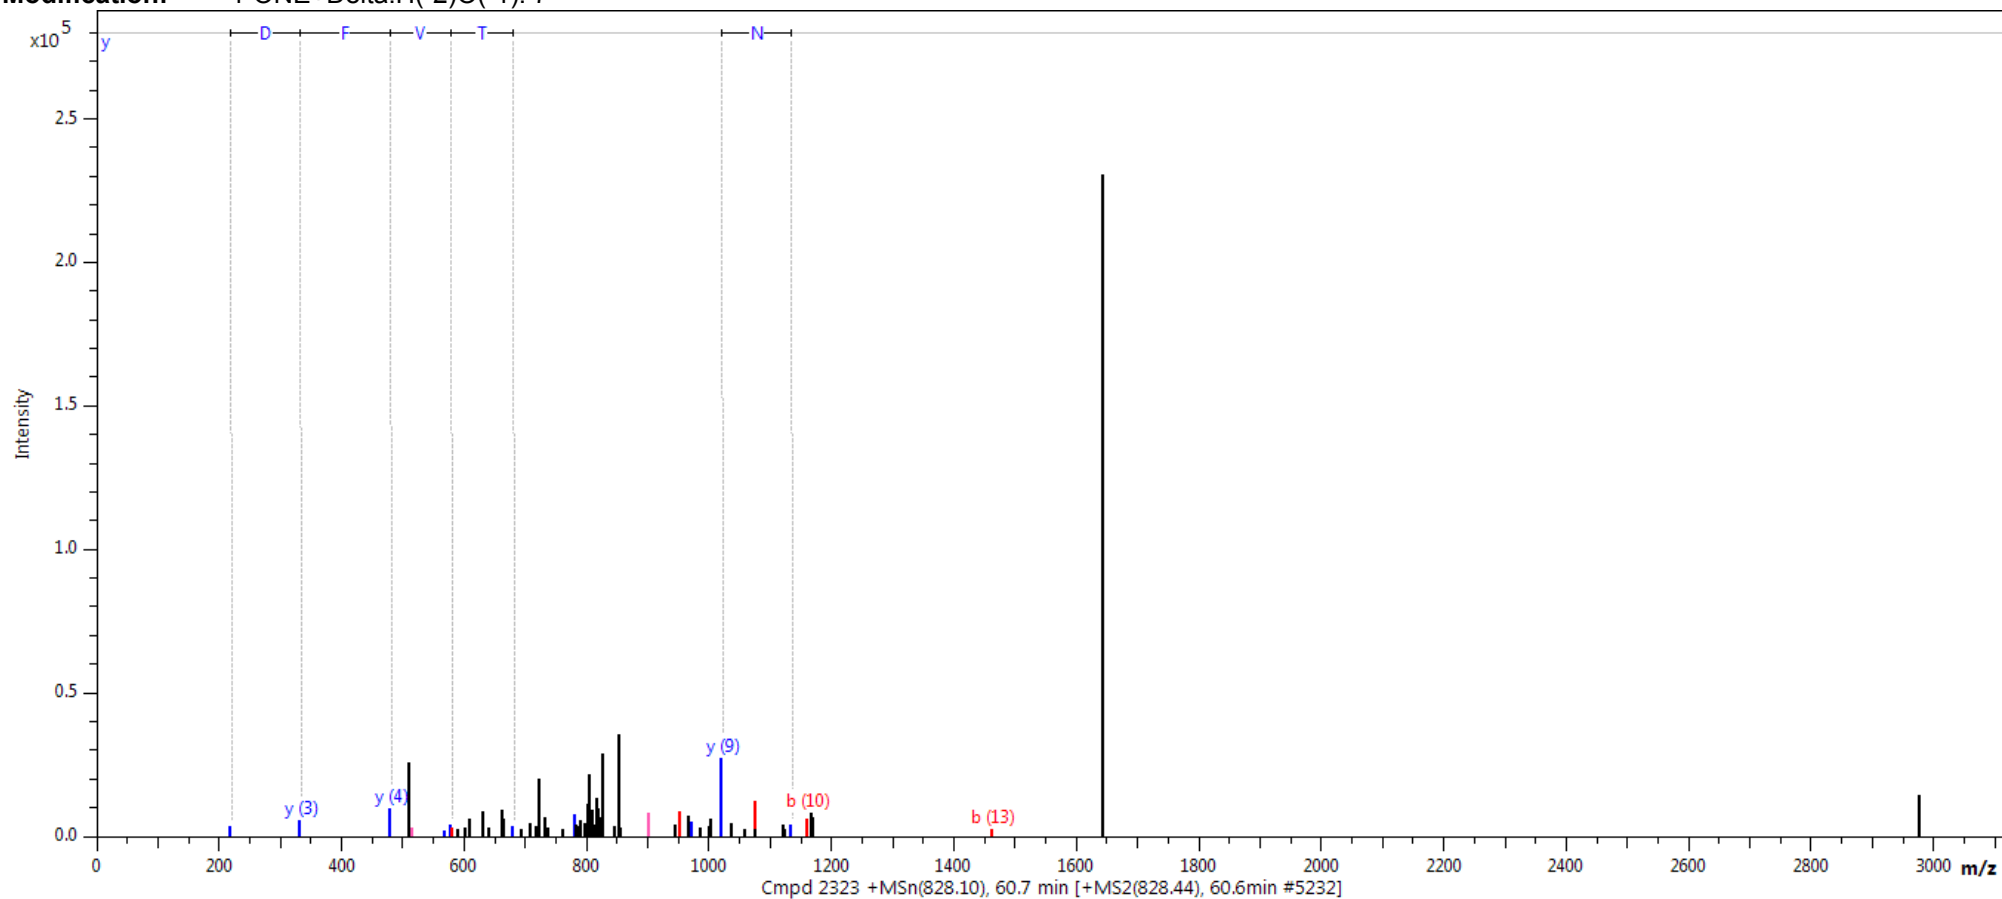

# MSMS Protein Single Report

**Source:** D:/Data/Petersen/013113/Fritz #9\_Tray02-E9\_01\_638.d  
**Protein:** 78 kDa glucose-regulated protein OS=Homo sapiens GN=HSPA5 PE=1 SV=2  
**Accession:** GRP78\_HUMAN **Parent m/z:** 775.84, 3+  
**Sequence:** K.KVTHAVVTVPAYFNDAQR.Q **Score:** 42.54

**Modification:** 4-ONE: 1, 4

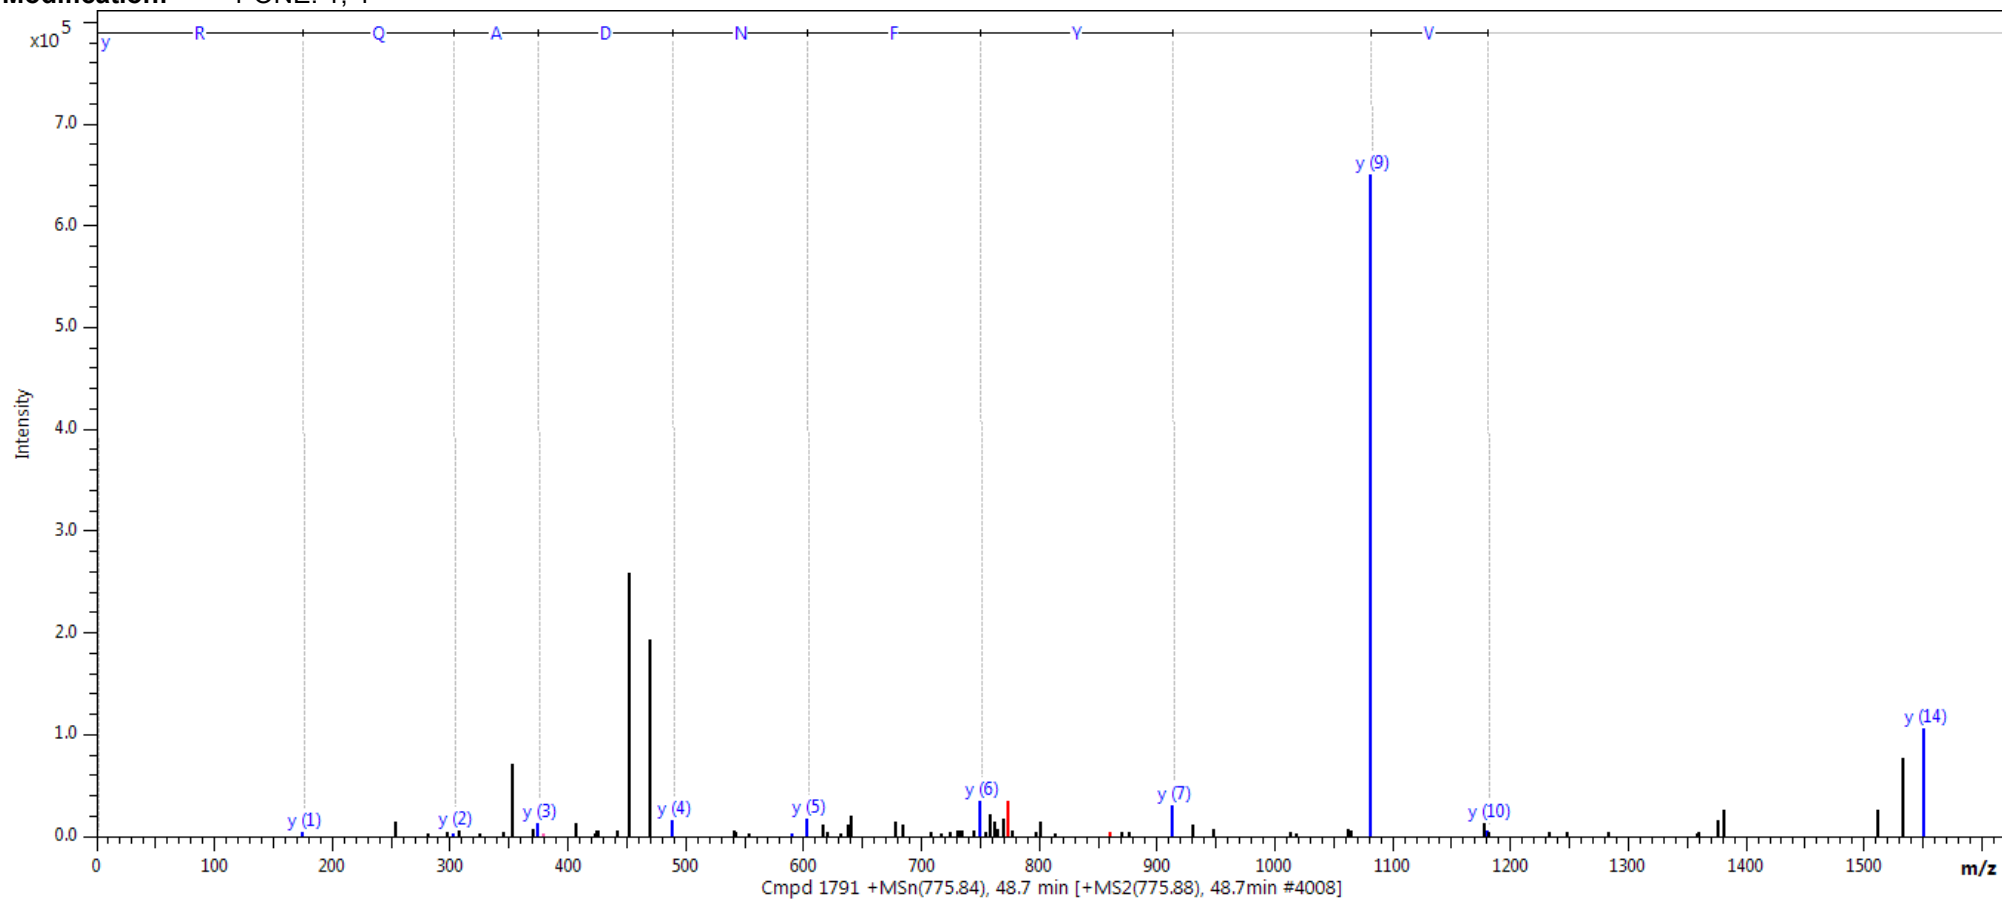

# MSMS Protein Single Report

**Source:** D:/Data/Petersen/022813/GRP78 HNEred trypsin\_Tray02-C2\_01\_750.d  
**Protein:** 78 kDa glucose-regulated protein OS=Homo sapiens GN=HSPA5 PE=1 SV=2  
**Accession:** GRP78\_HUMAN **Parent m/z:** 725.43, 3+  
**Sequence:** K.KVTHAVVTVPAYFNDAGR.Q **Score:** 38.85

**Modification:** HNE+Delta:H(2): 1

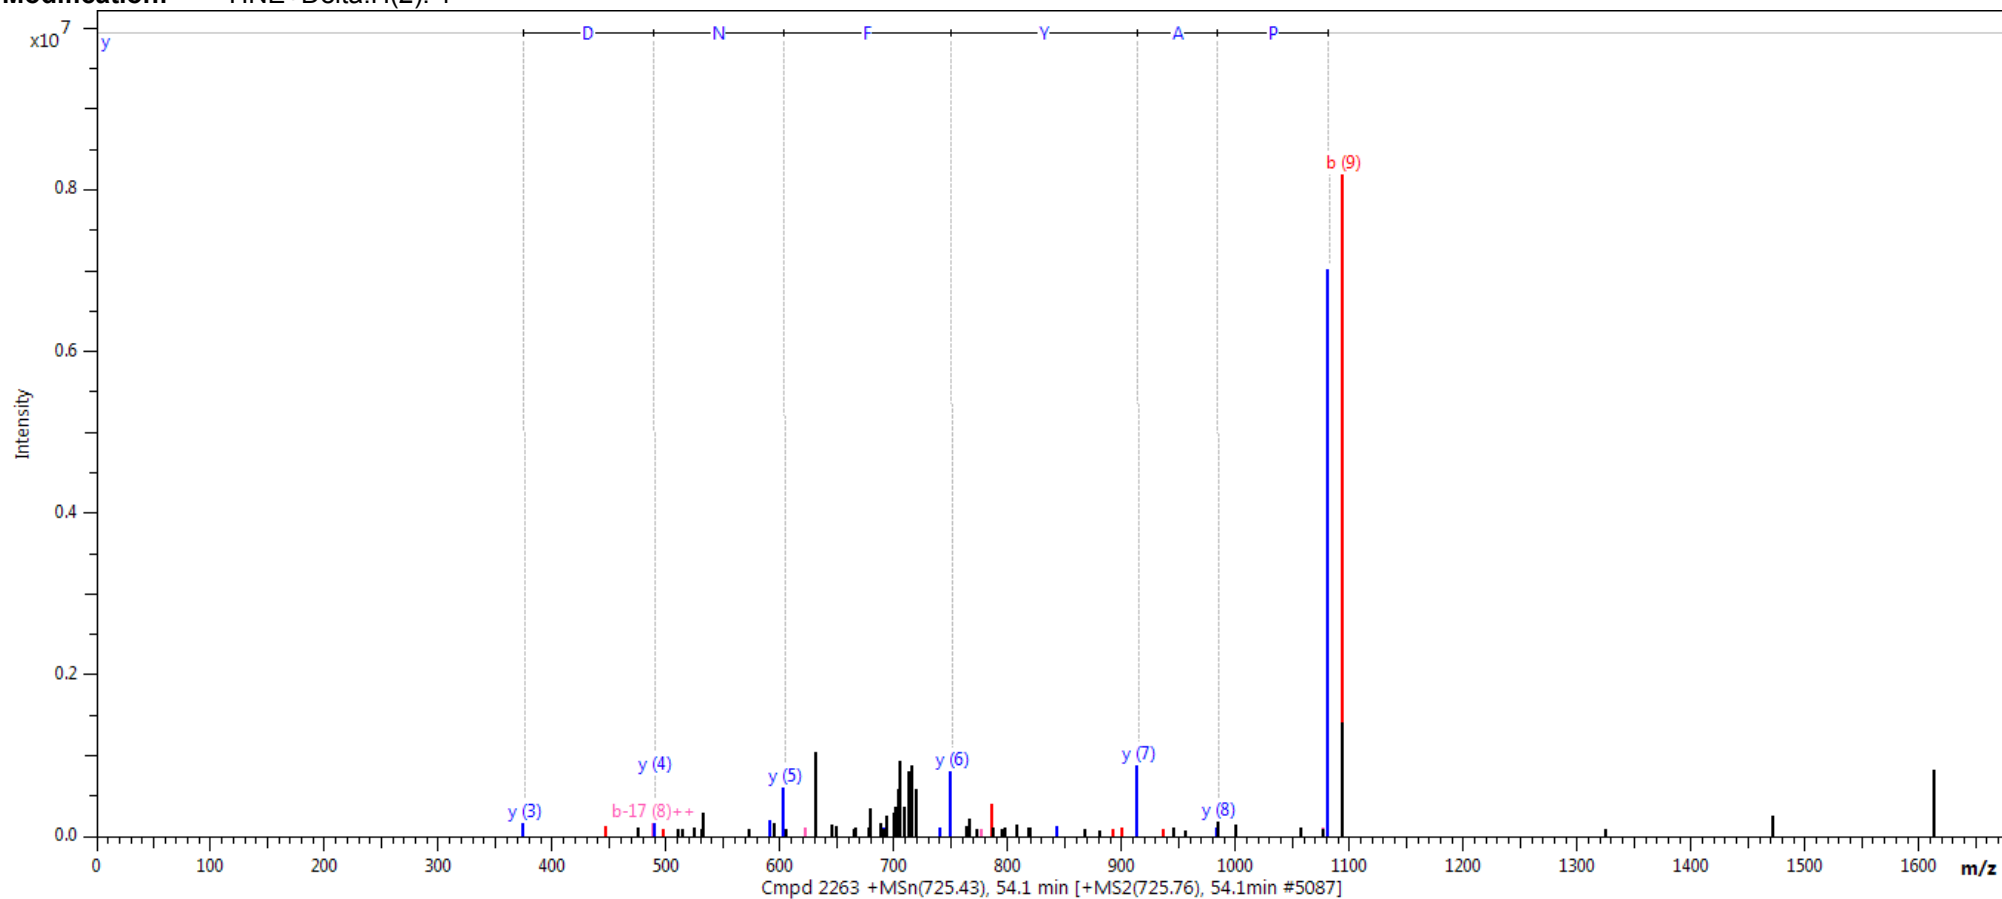

# MSMS Protein Single Report

**Source:** D:/Data/Petersen/022813/GRP78 HNEred trypsin\_Tray02-C2\_01\_750.d  
**Protein:** 78 kDa glucose-regulated protein OS=Homo sapiens GN=HSPA5 PE=1 SV=2  
**Accession:** GRP78\_HUMAN **Parent m/z:** 719.42, 3+  
**Sequence:** K.KVTHAVVTVPAYFNDAQR.Q **Score:** 48.67

**Modification:** 4-HNE Schiff: 1

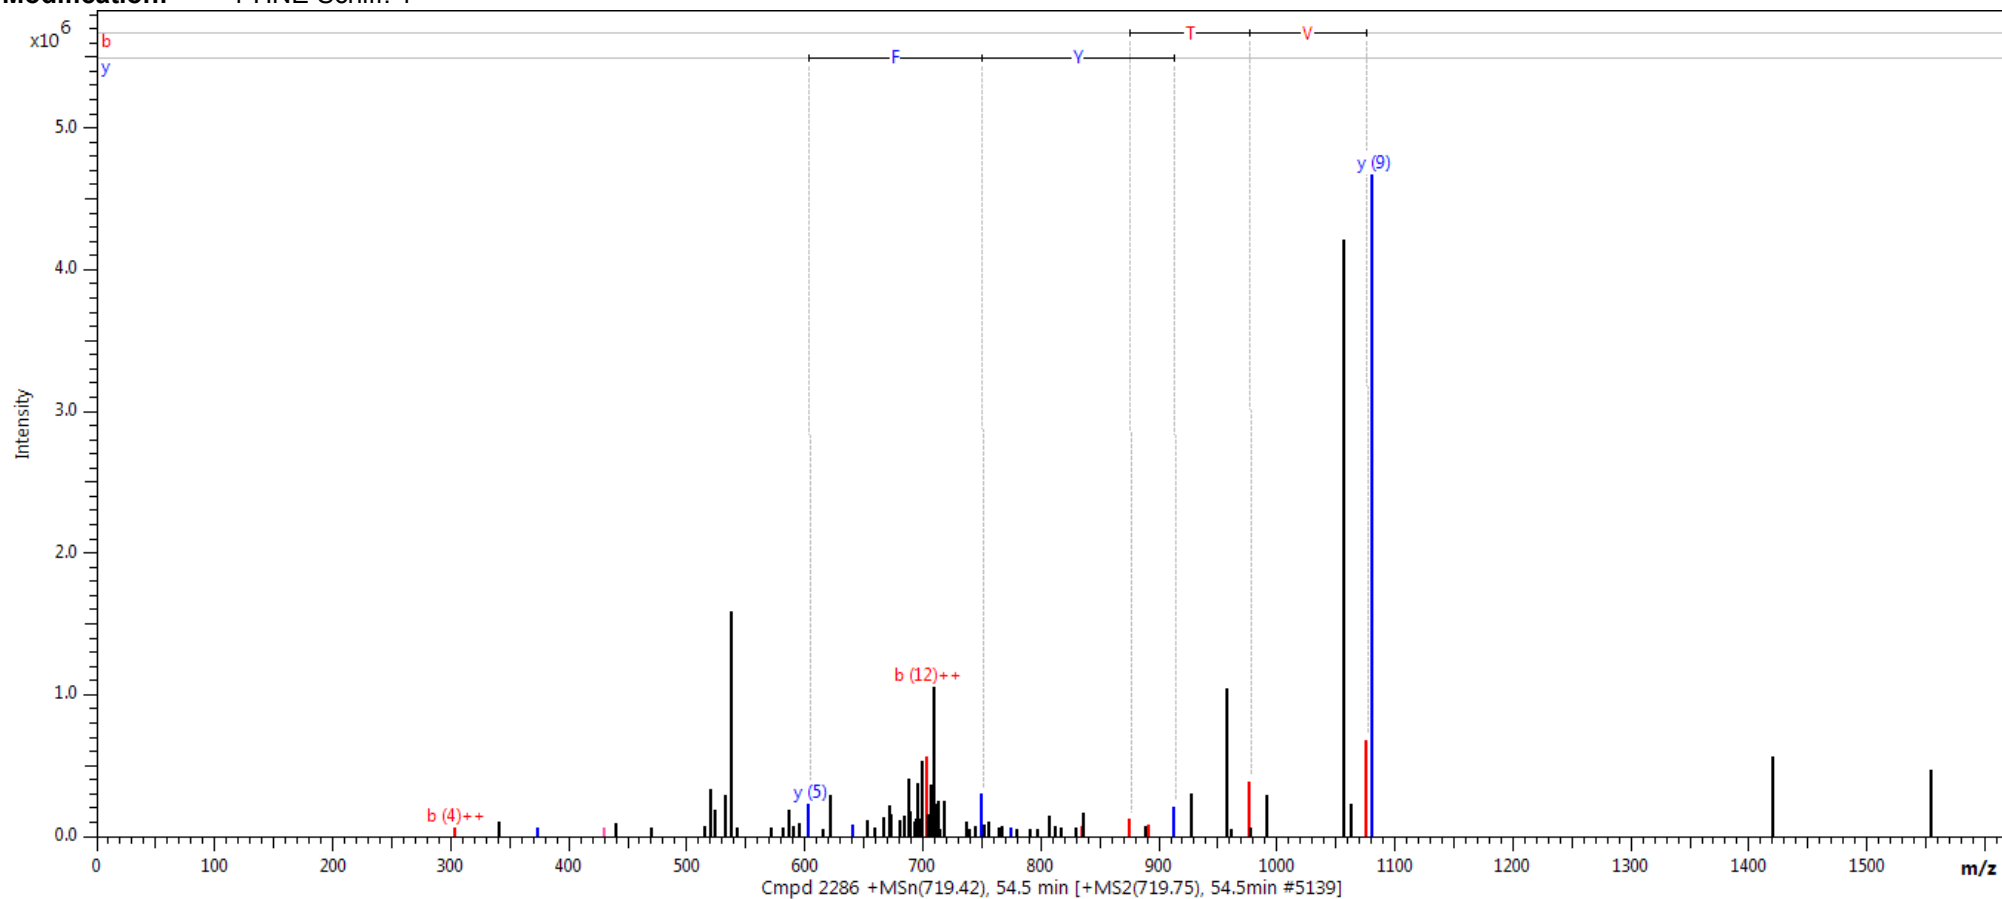

# MSMS Protein Single Report

**Source:** D:/Data/Petersen/013113/Fritz #11\_Tray02-F2\_01\_640.d  
**Protein:** 78 kDa glucose-regulated protein OS=Homo sapiens GN=HSPA5 PE=1 SV=2  
**Accession:** GRP78\_HUMAN **Parent m/z:** 682.72, 3+  
**Sequence:** K.VTHAVVTVPAYFNDAQR.Q **Score:** 76.05

**Modification:** HNE+Delta:H(2): 3

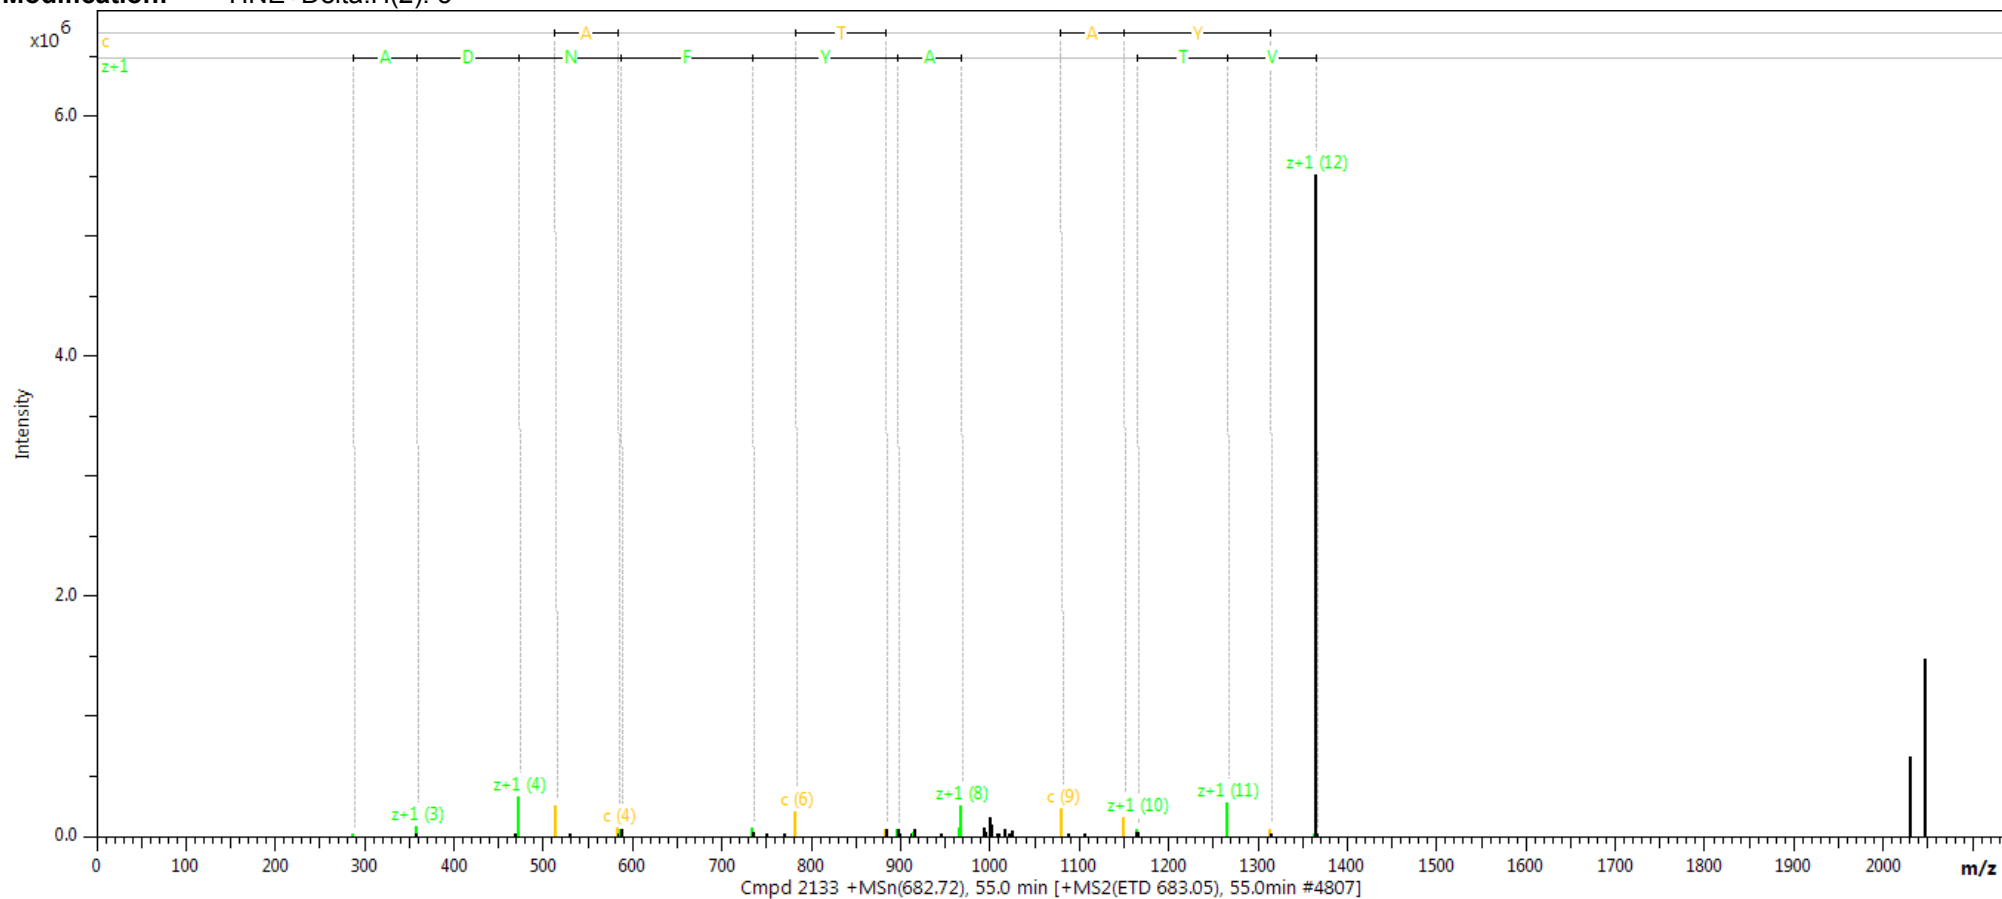

# MSMS Protein Single Report

**Source:** D:/Data/Petersen/022813/GRP78 HNE trypsin\_Tray02-C1\_01\_749.d  
**Protein:** 78 kDa glucose-regulated protein OS=Homo sapiens GN=HSPA5 PE=1 SV=2  
**Accession:** GRP78\_HUMAN **Parent m/z:** 682.08, 3+  
**Sequence:** K.VTHAVVTVPAYFNDAQR.Q **Score:** 65.67

**Modification:** HNE: 3

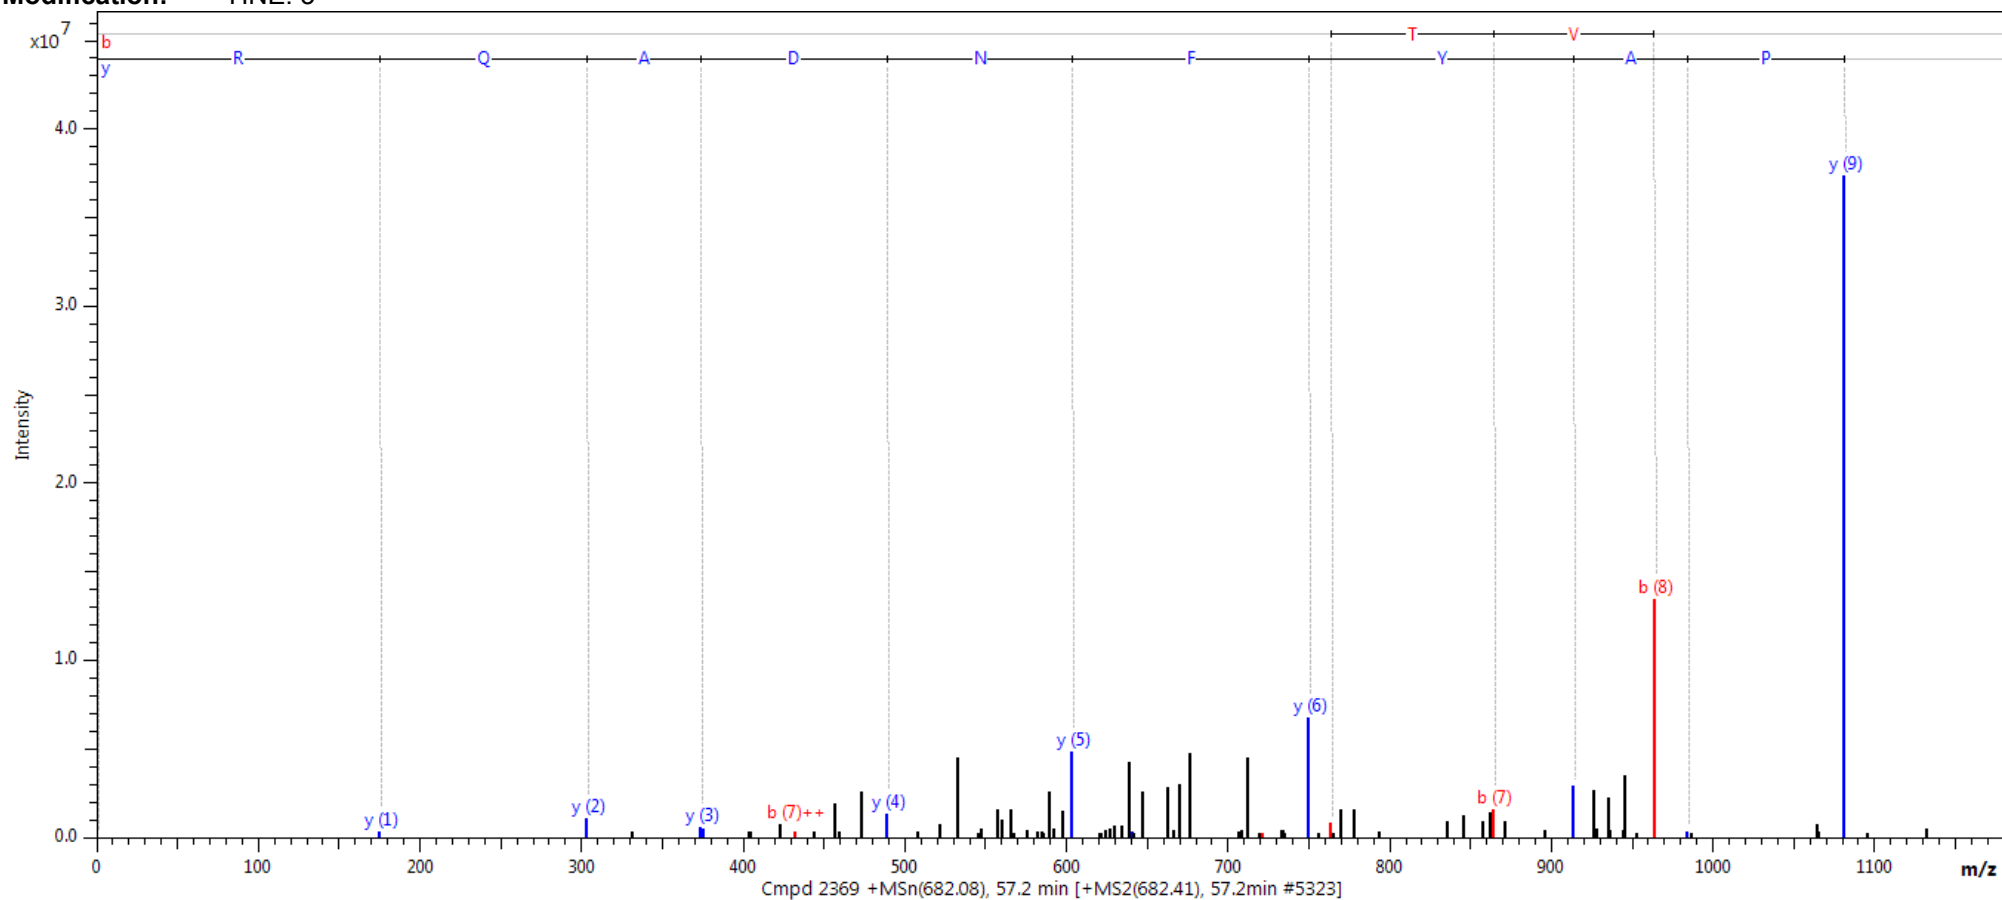

# MSMS Protein Single Report

**Source:** D:/Data/Petersen/022813/GRP78 HNEred trypsin\_Tray02-C2\_01\_750.d  
**Protein:** 78 kDa glucose-regulated protein OS=Homo sapiens GN=HSPA5 PE=1 SV=2  
**Accession:** GRP78\_HUMAN **Parent m/z:** 682.75, 3+  
**Sequence:** K.VTHAVVTVPAYFNDAQR.Q **Score:** 71.2

**Modification:** HNE+Delta:H(2): 3

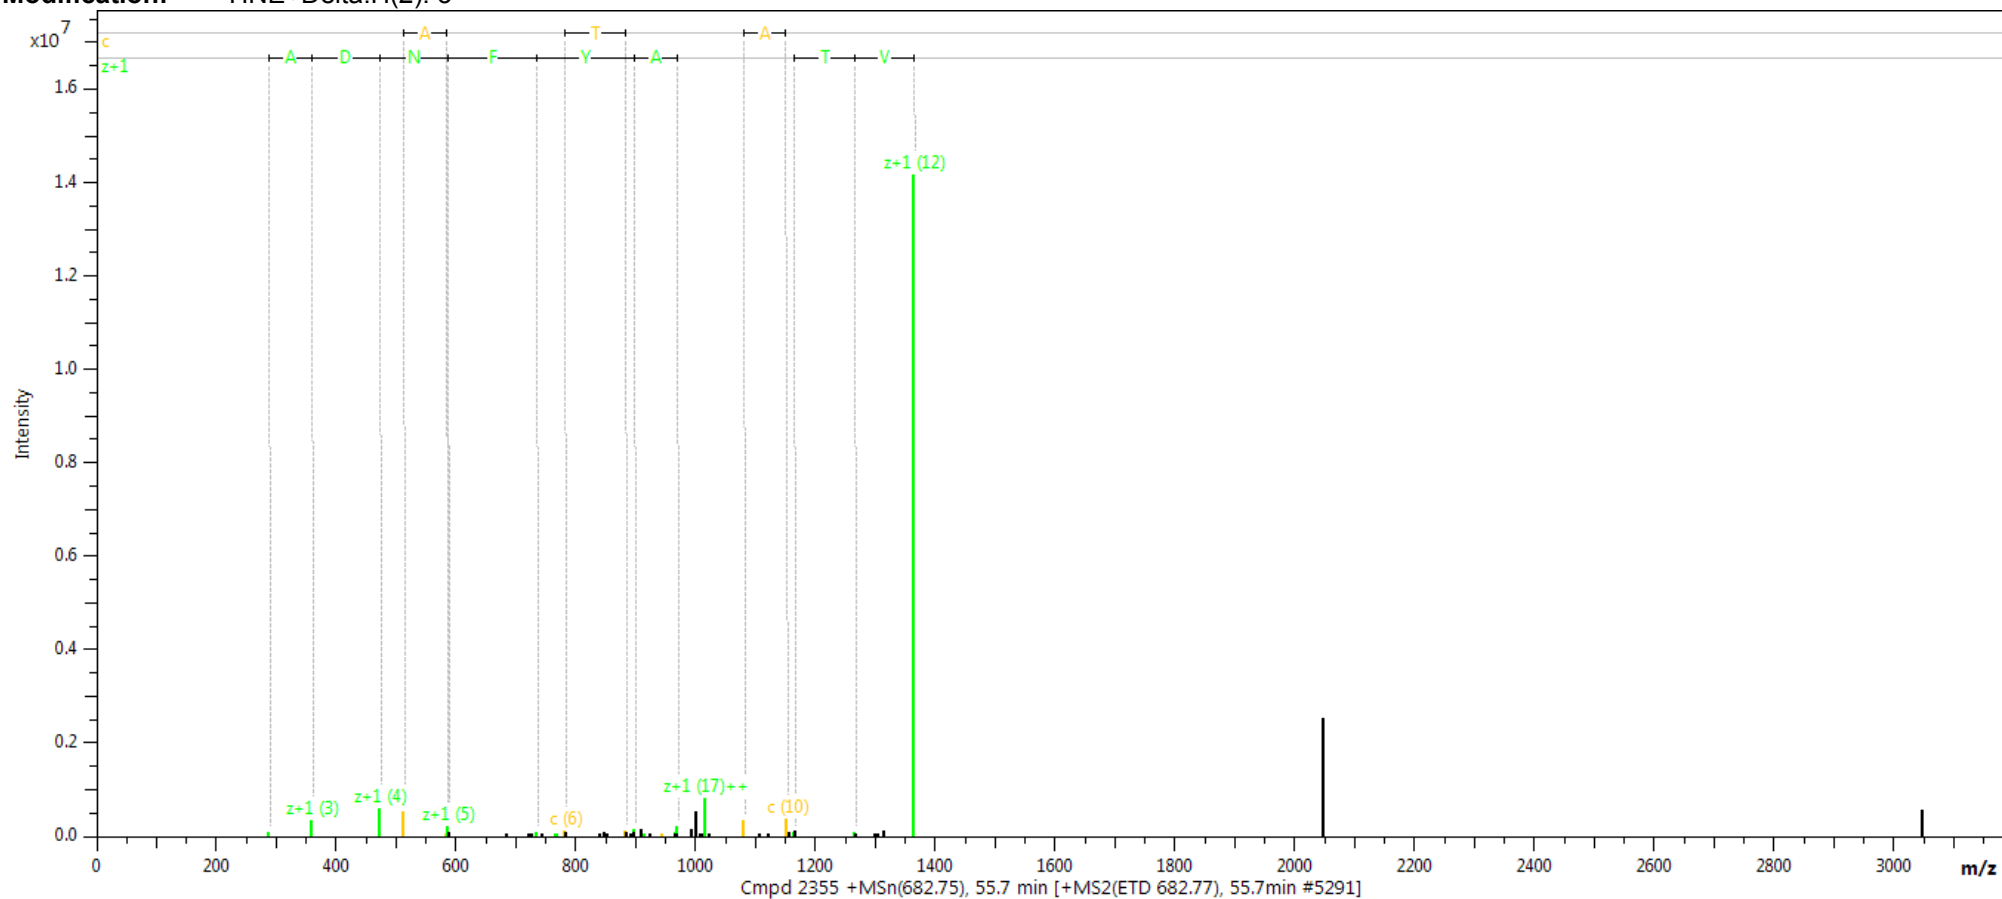



# MSMS Protein Single Report

**Source:** D:/Data/Petersen/013113/Fritz #11\_Tray02-F2\_01\_640.d  
**Protein:** 78 kDa glucose-regulated protein OS=Homo sapiens GN=HSPA5 PE=1 SV=2  
**Accession:** GRP78\_HUMAN **Parent m/z:** 652.72, 3+  
**Sequence:** R.IINEPTAAAIAYGLDKR.E **Score:** 20.1

**Modification:** 4-HNE Schiff: 16

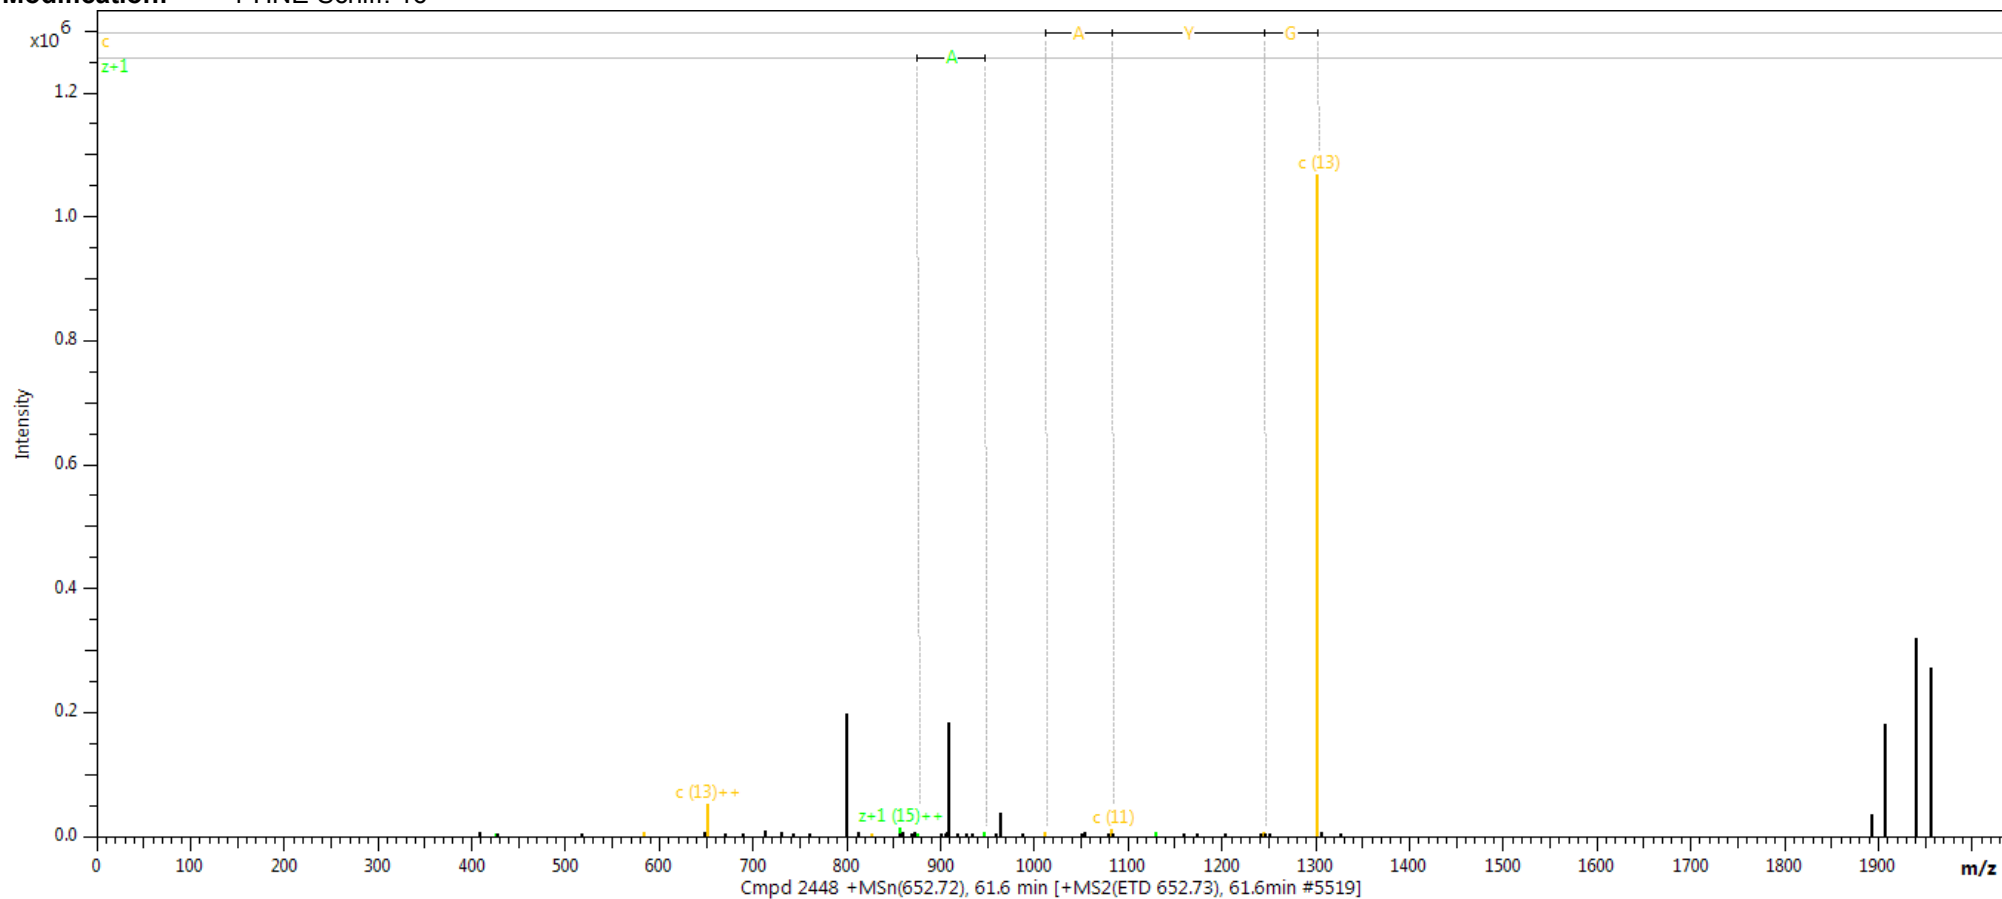

# MSMS Protein Single Report

**Source:** D:/Data/Petersen/013113/Fritz #9\_Tray02-E9\_01\_638.d  
**Protein:** 78 kDa glucose-regulated protein OS=Homo sapiens GN=HSPA5 PE=1 SV=2  
**Accession:** GRP78\_HUMAN  
**Sequence:** R.IINEPTAAAIAYGLDKR.E

**Parent m/z:** 651.4, 3+  
**Score:** 47.96

**Modification:** 4-ONE+Delta:H(-2)O(-1): 16

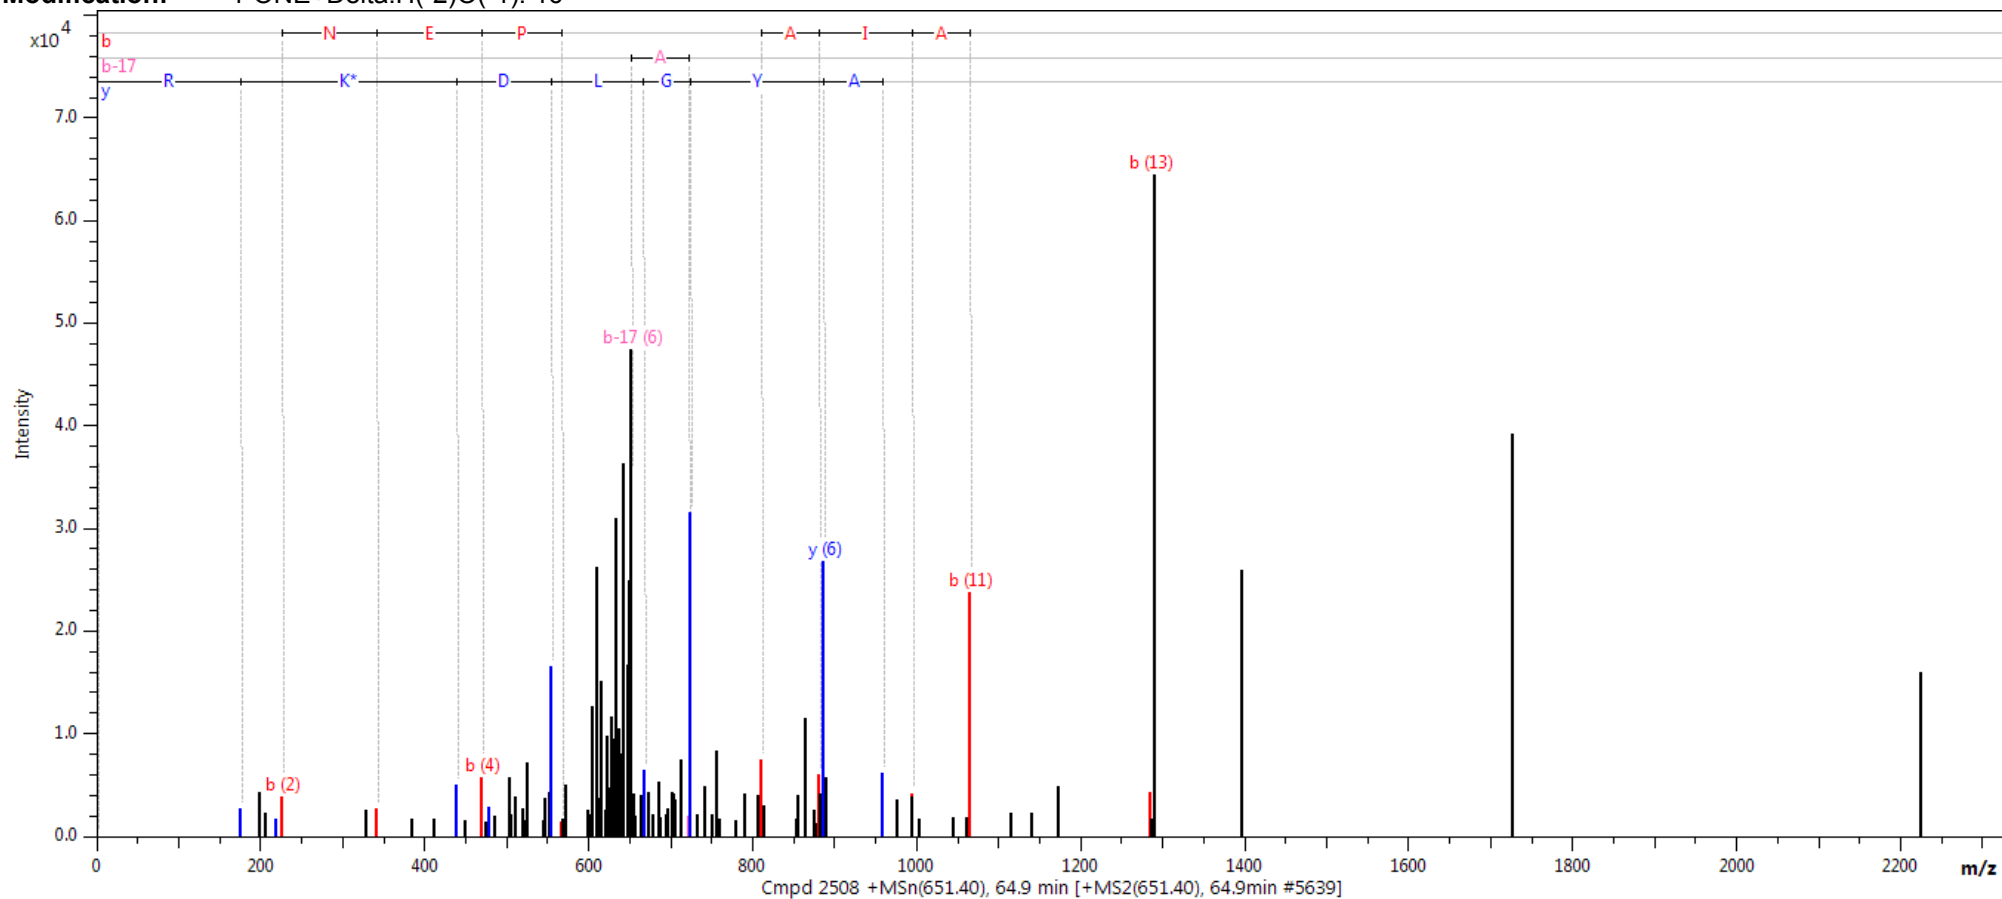

# MSMS Protein Single Report

**Source:** D:/Data/Petersen/022813/GRP78 HNEred trypsin\_Tray02-C2\_01\_750.d  
**Protein:** 78 kDa glucose-regulated protein OS=Homo sapiens GN=HSPA5 PE=1 SV=2  
**Accession:** GRP78\_HUMAN **Parent m/z:** 578.36, 2+  
**Sequence:** R.ALSSQHQAR.I **Score:** 56.18

**Modification:** HNE+Delta:H(2): 6

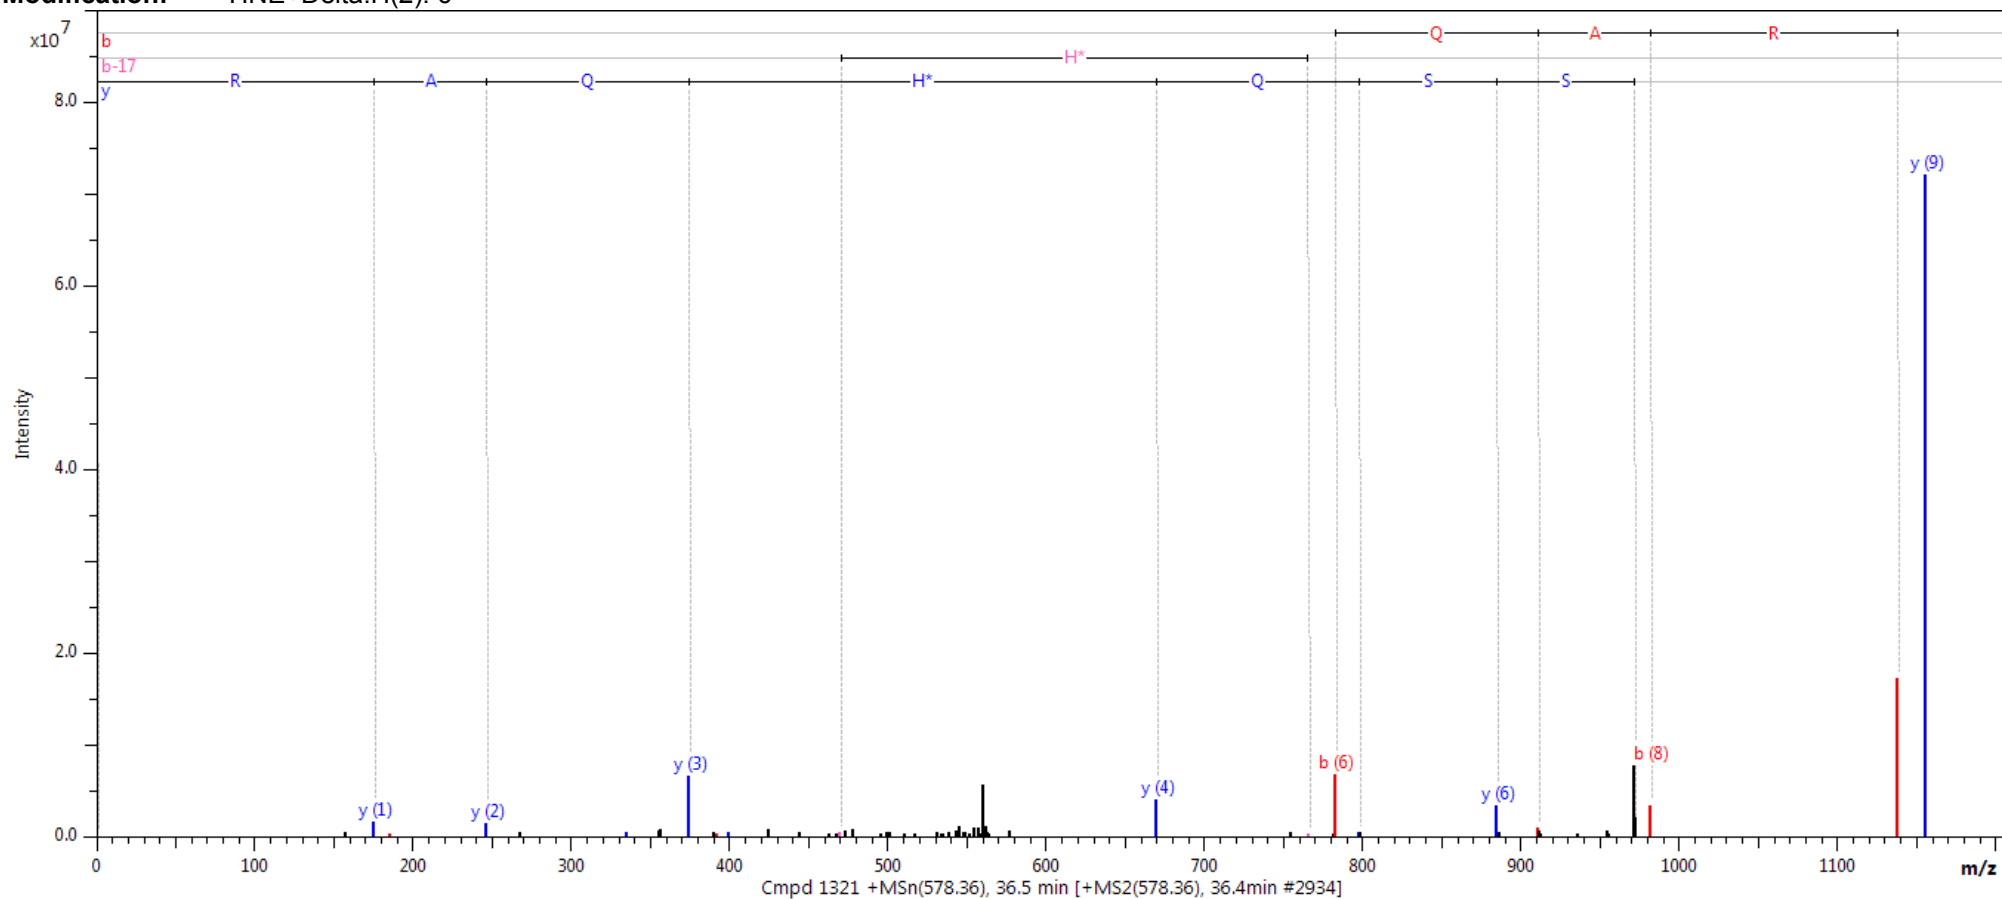

# MSMS Protein Single Report

**Source:** D:/Data/Petersen/013113/Fritz #11\_Tray02-F2\_01\_640.d  
**Protein:** 78 kDa glucose-regulated protein OS=Homo sapiens GN=HSPA5 PE=1 SV=2  
**Accession:** GRP78\_HUMAN **Parent m/z:** 556.99, 3+  
**Sequence:** R.AKFEELNMDLFR.S **Score:** 24.87

**Modification:** 4-HNE Schiff: 2; Oxidation: 8

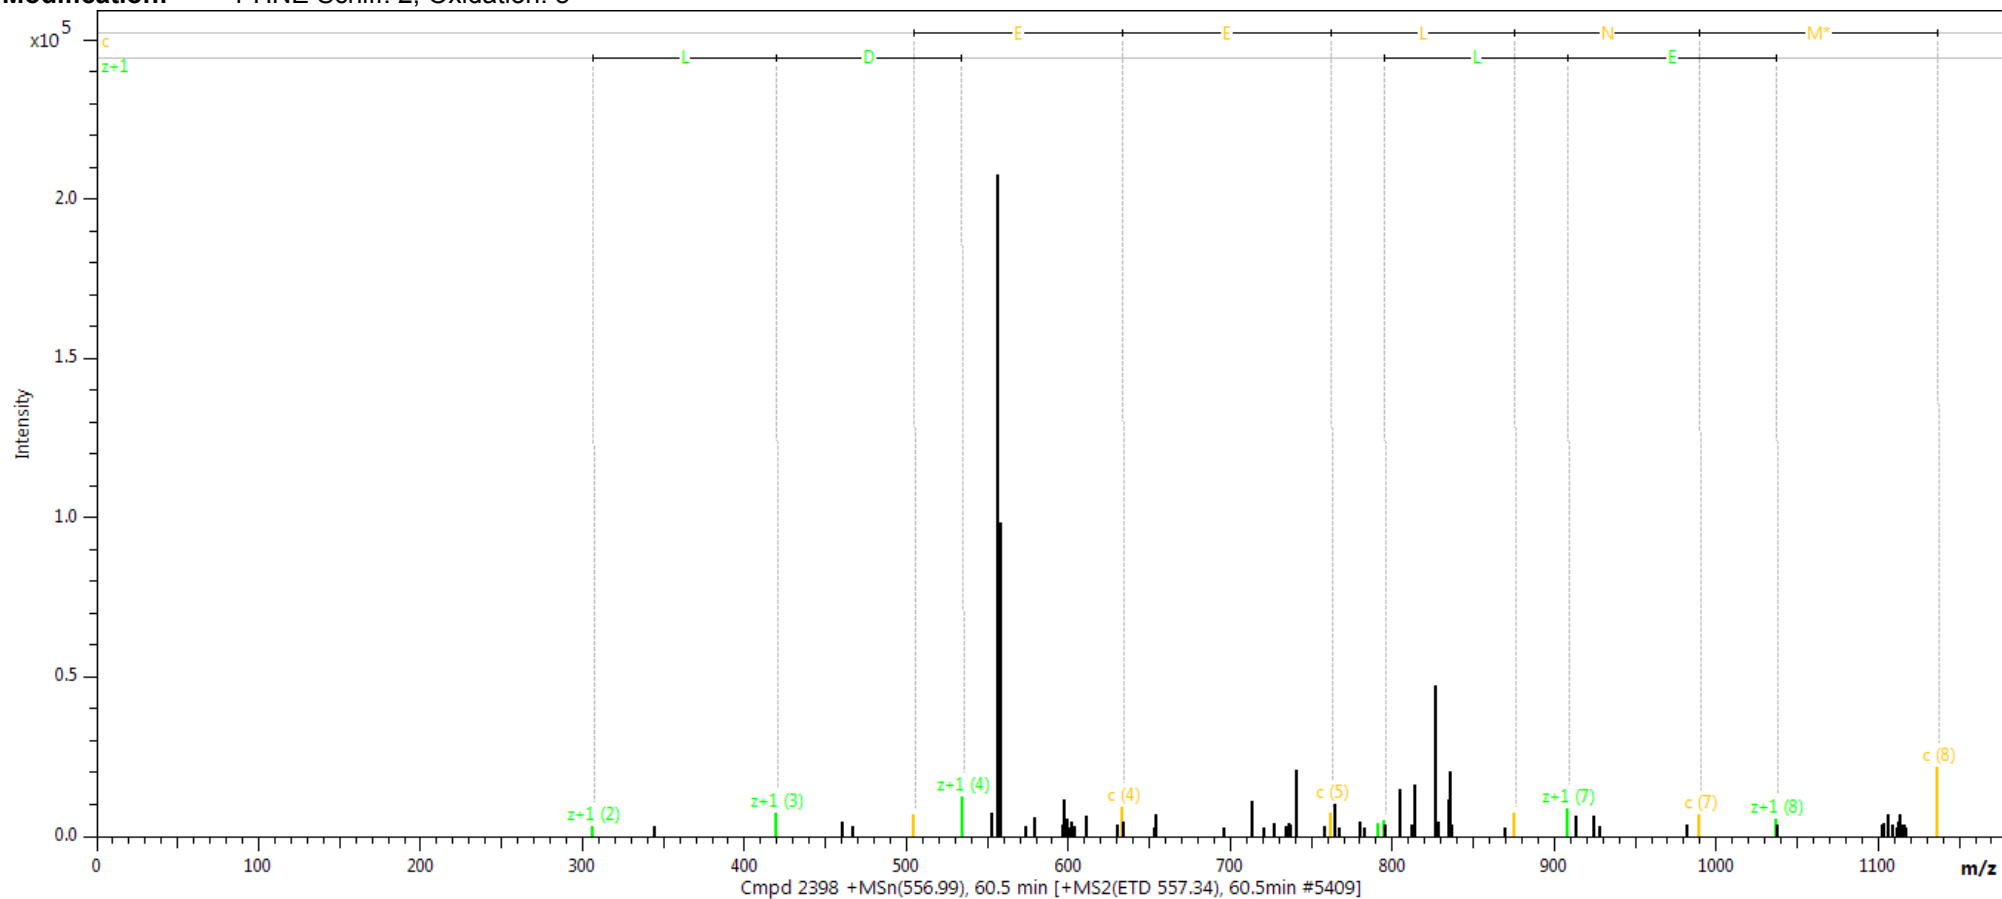

# MSMS Protein Single Report

**Source:** D:/Data/Petersen/013113/Fritz #11\_Tray02-F2\_01\_640.d  
**Protein:** 78 kDa glucose-regulated protein OS=Homo sapiens GN=HSPA5 PE=1 SV=2  
**Accession:** GRP78\_HUMAN **Parent m/z:** 577.02, 3+  
**Sequence:** K.KSDIDEIVLVGGSTR.I **Score:** 30.9

**Modification:** 4-HNE Schiff: 1

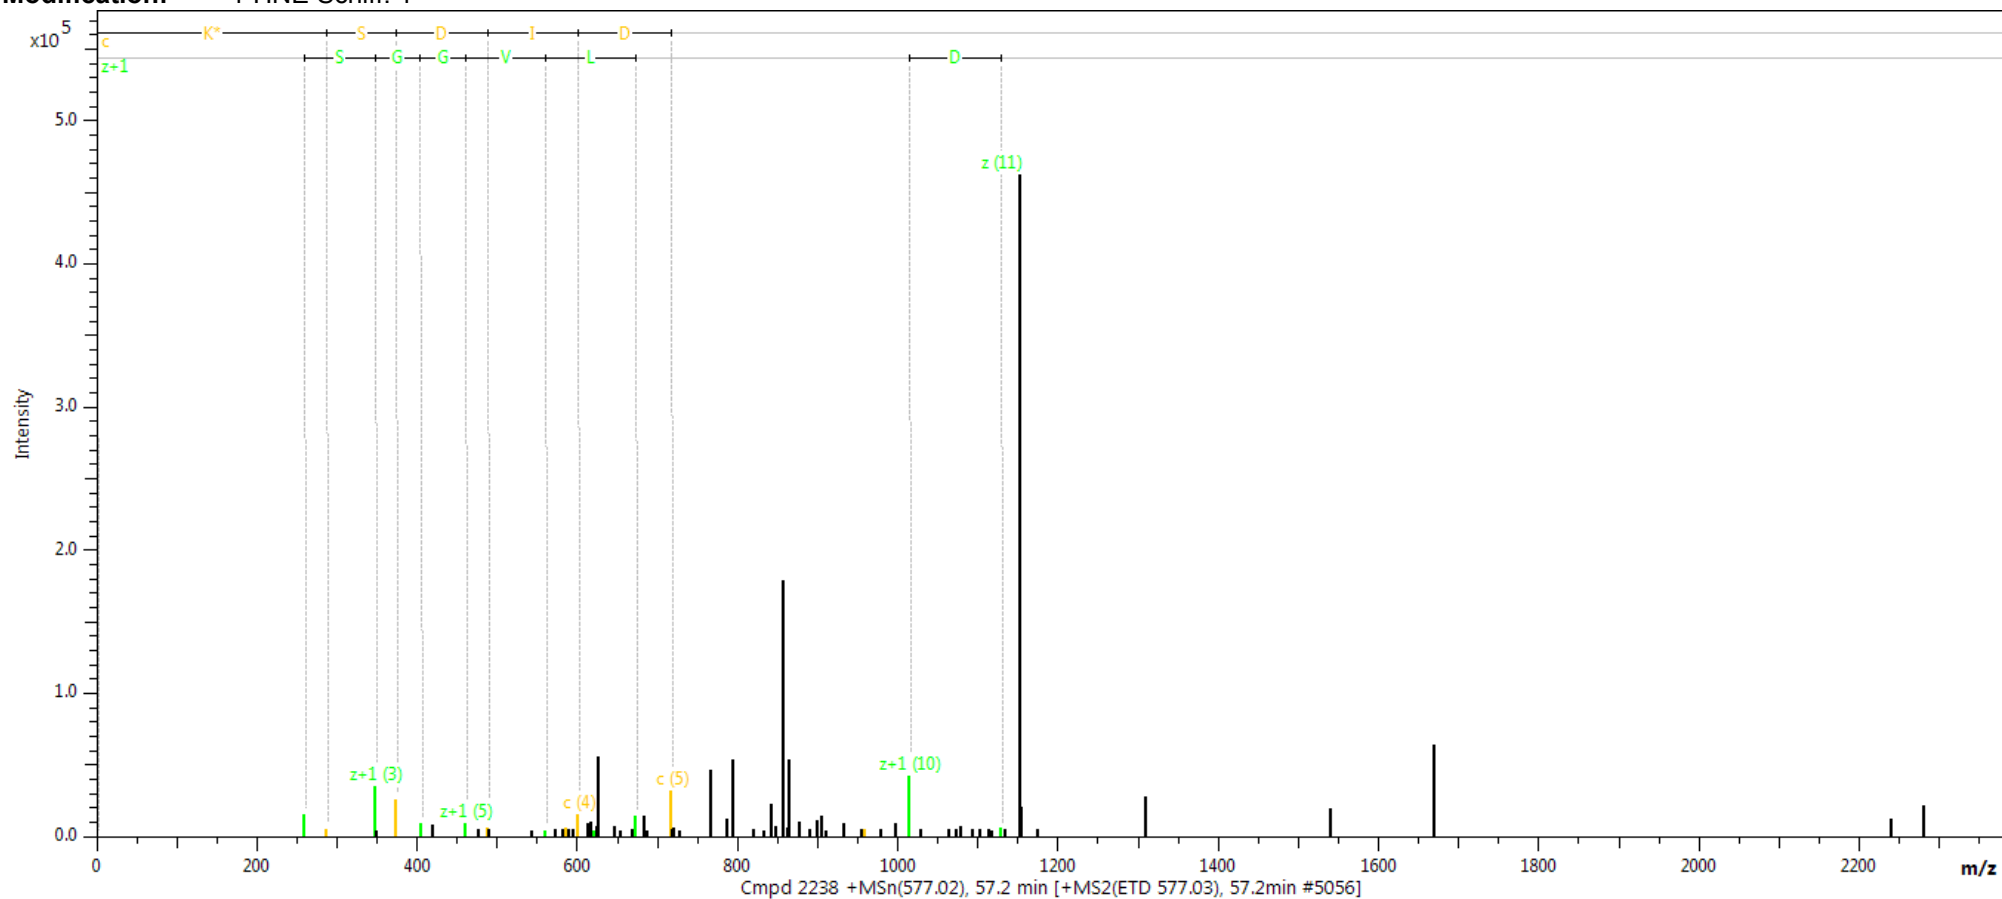

# MSMS Protein Single Report

**Source:** D:/Data/Petersen/013113/Fritz #11\_Tray02-F2\_01\_640.d  
**Protein:** 78 kDa glucose-regulated protein OS=Homo sapiens GN=HSPA5 PE=1 SV=2  
**Accession:** GRP78\_HUMAN **Parent m/z:** 402.95, 3+  
**Sequence:** R.IPKIQQLVK.E **Score:** 27.24

**Modification:** 4-HNE Schiff: 3

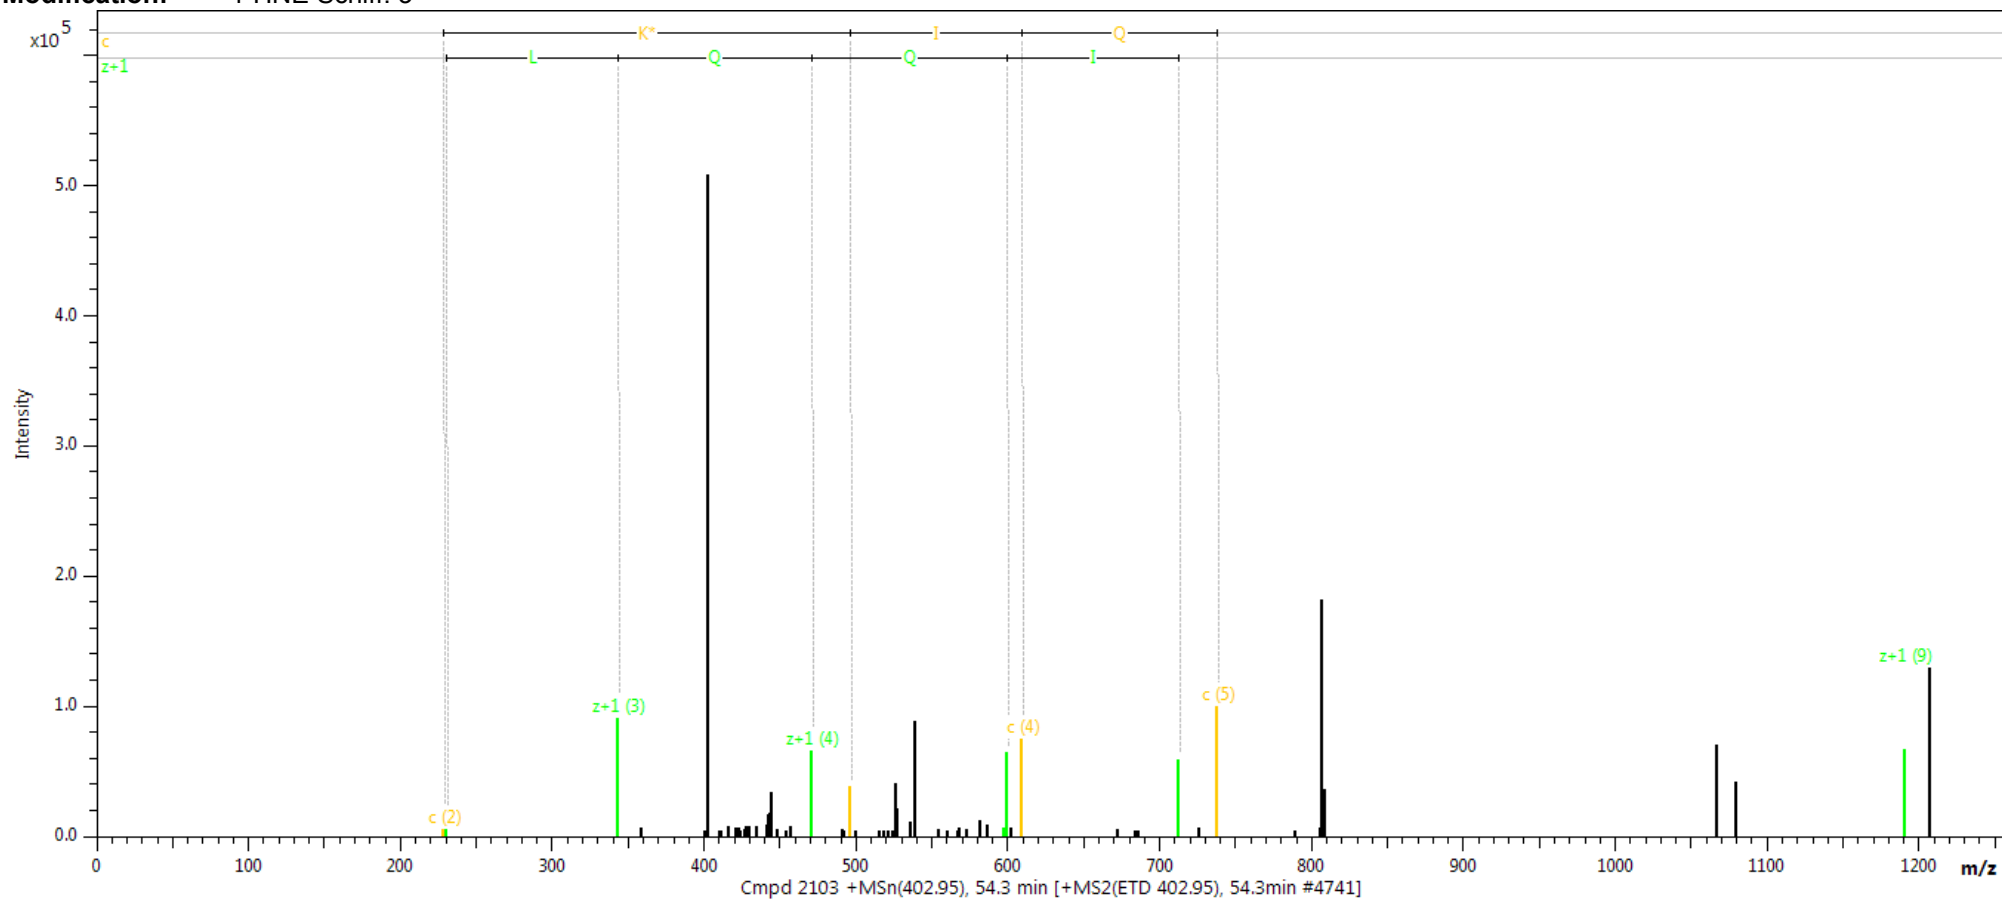

# MSMS Protein Single Report

**Source:** D:/Data/Petersen/022813/GRP78 ONE trypsin\_Tray02-C3\_01\_751.d  
**Protein:** 78 kDa glucose-regulated protein OS=Homo sapiens GN=HSPA5 PE=1 SV=2  
**Accession:** GRP78\_HUMAN  
**Sequence:** R.IPKIQQLVK.E  
**Parent m/z:** 610.97, 2+  
**Score:** 25.64

**Modification:** 4-ONE: 3

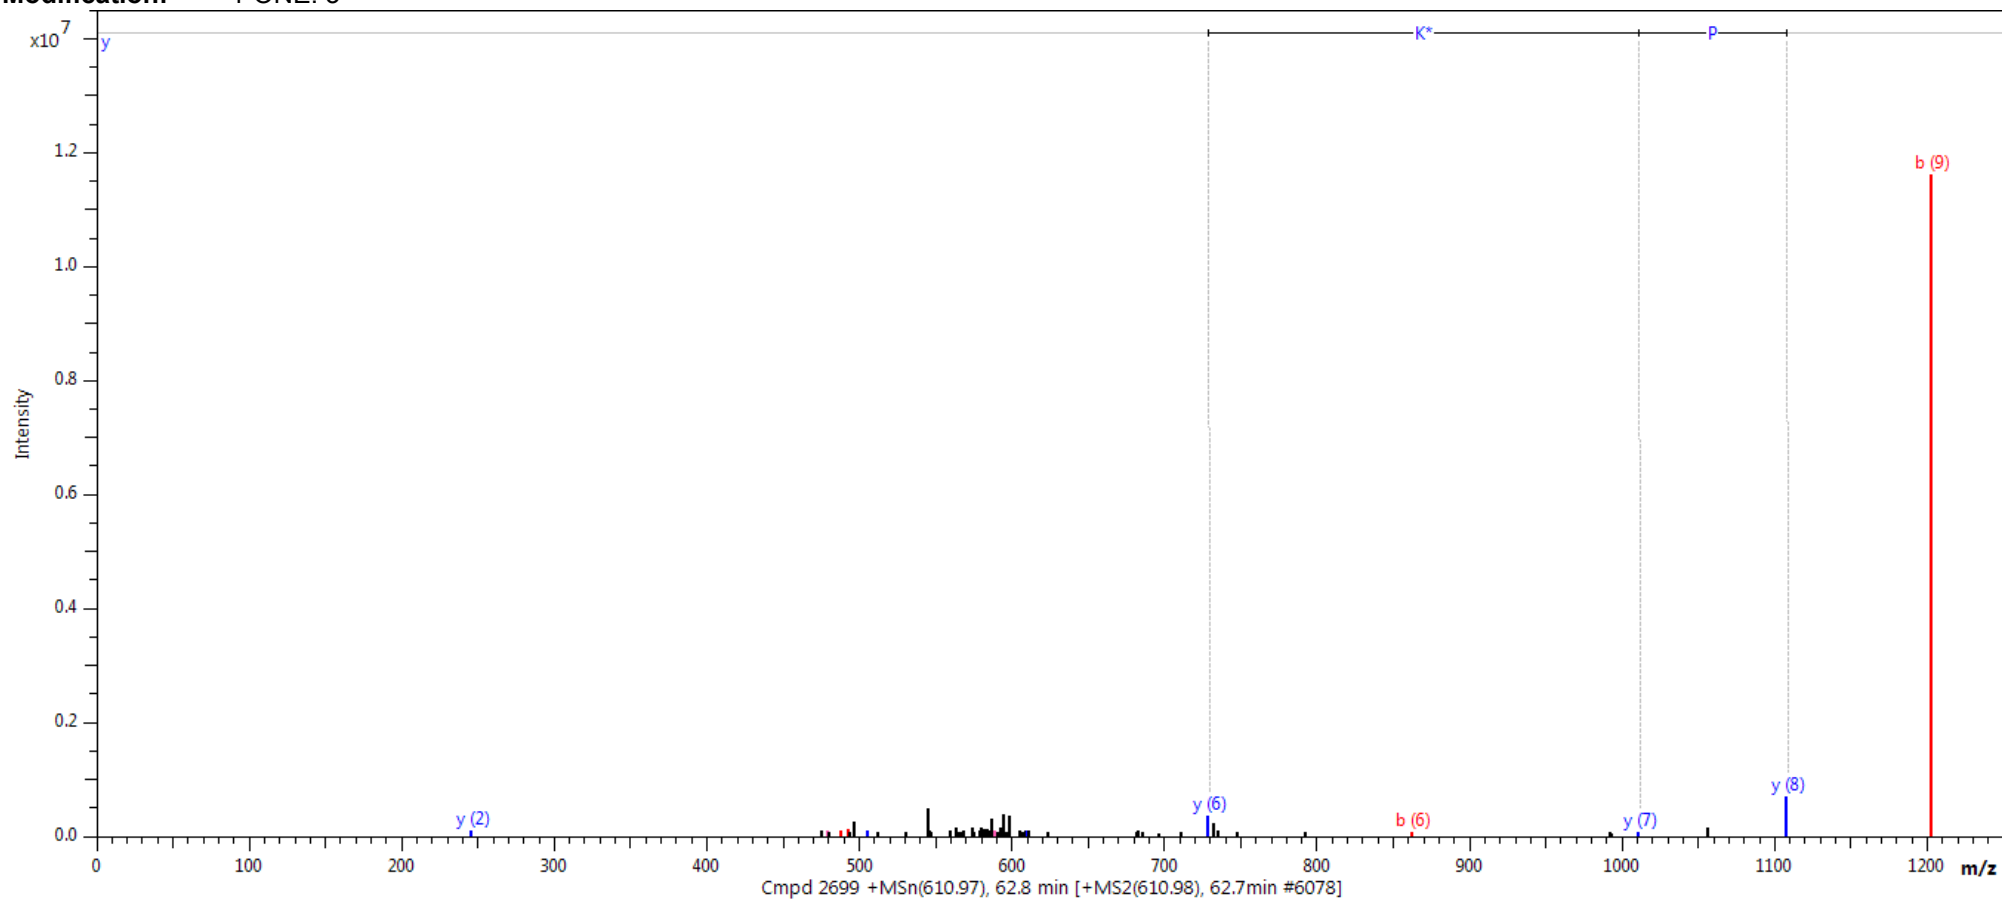

# MSMS Protein Single Report

**Source:** D:/Data/Petersen/013113/Fritz #11\_Tray02-F2\_01\_640.d  
**Protein:** 78 kDa glucose-regulated protein OS=Homo sapiens GN=HSPA5 PE=1 SV=2  
**Accession:** GRP78\_HUMAN **Parent m/z:** 698.04, 3+  
**Sequence:** K.DNHLLGTFDLTGIPPAPR.G **Score:** 37.15

**Modification:** HNE+Delta:H(2): 3

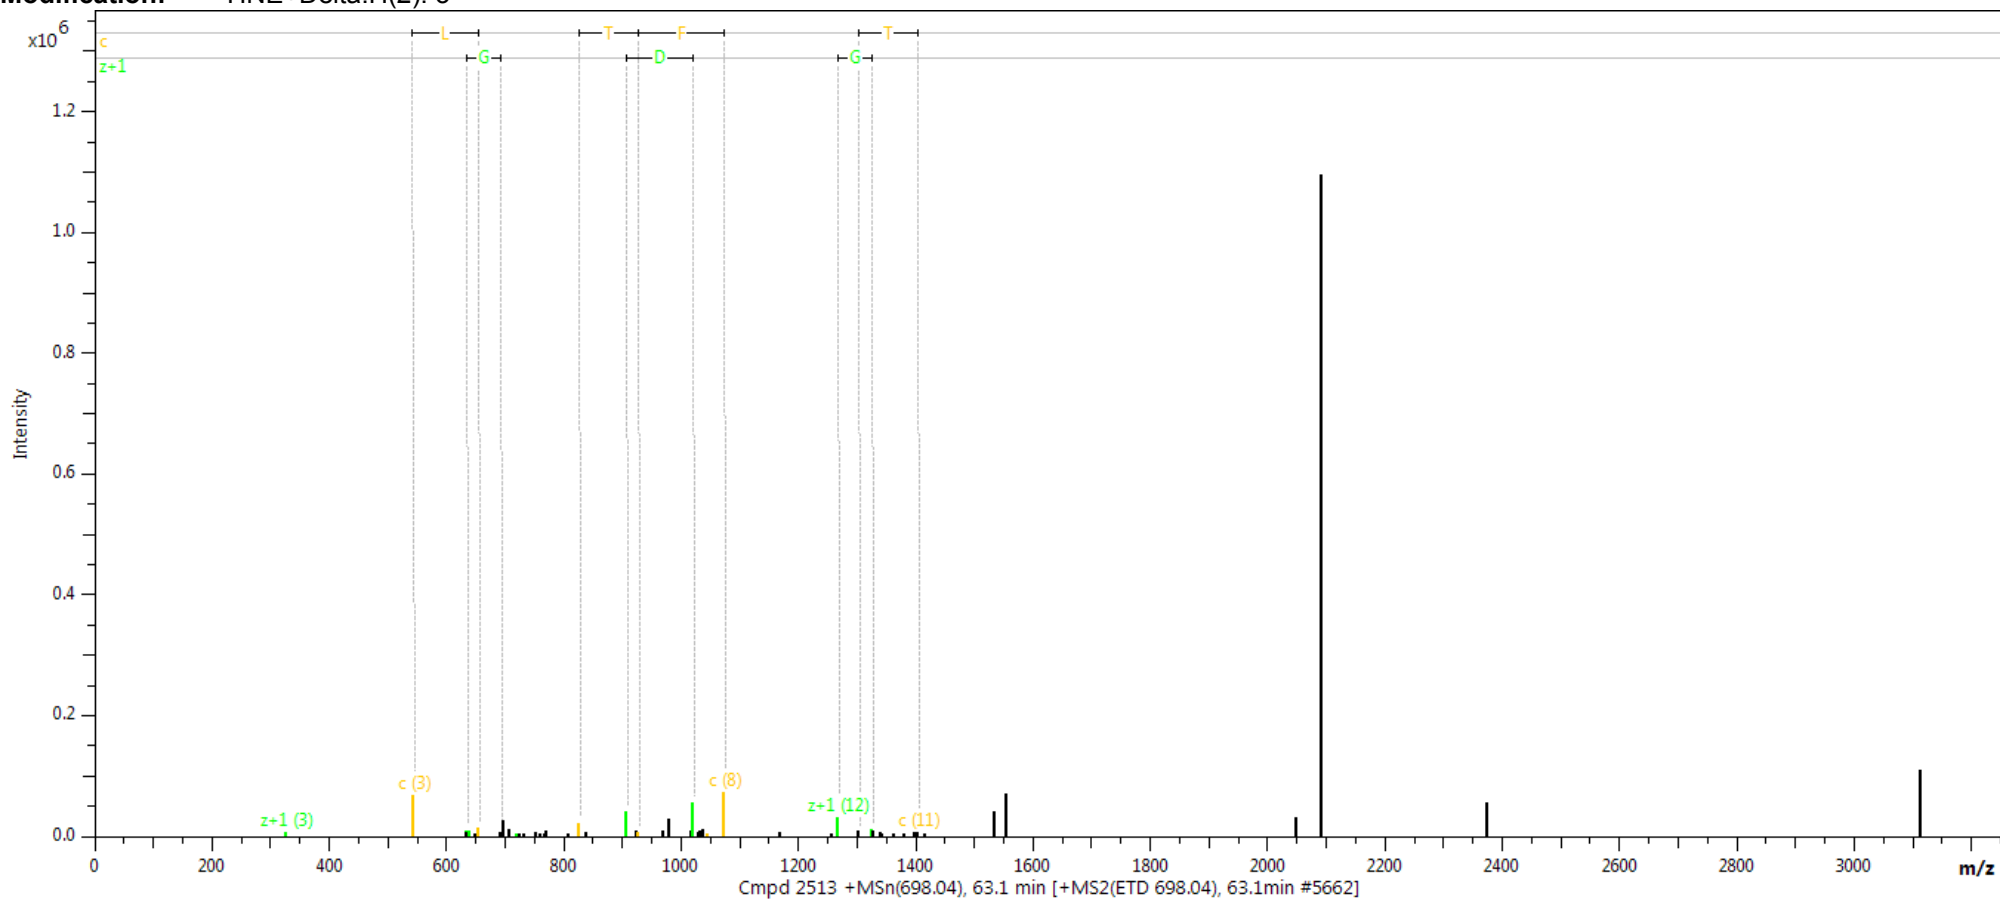



# MSMS Protein Single Report

**Source:** D:/Data/Petersen/022813/GRP78 HNE trypsin\_Tray02-C1\_01\_749.d  
**Protein:** 78 kDa glucose-regulated protein OS=Homo sapiens GN=HSPA5 PE=1 SV=2  
**Accession:** GRP78\_HUMAN **Parent m/z:** 697.41, 3+  
**Sequence:** K.DNHLLGTFDLTGIPPAPR.G **Score:** 26.03

**Modification:** HNE: 3

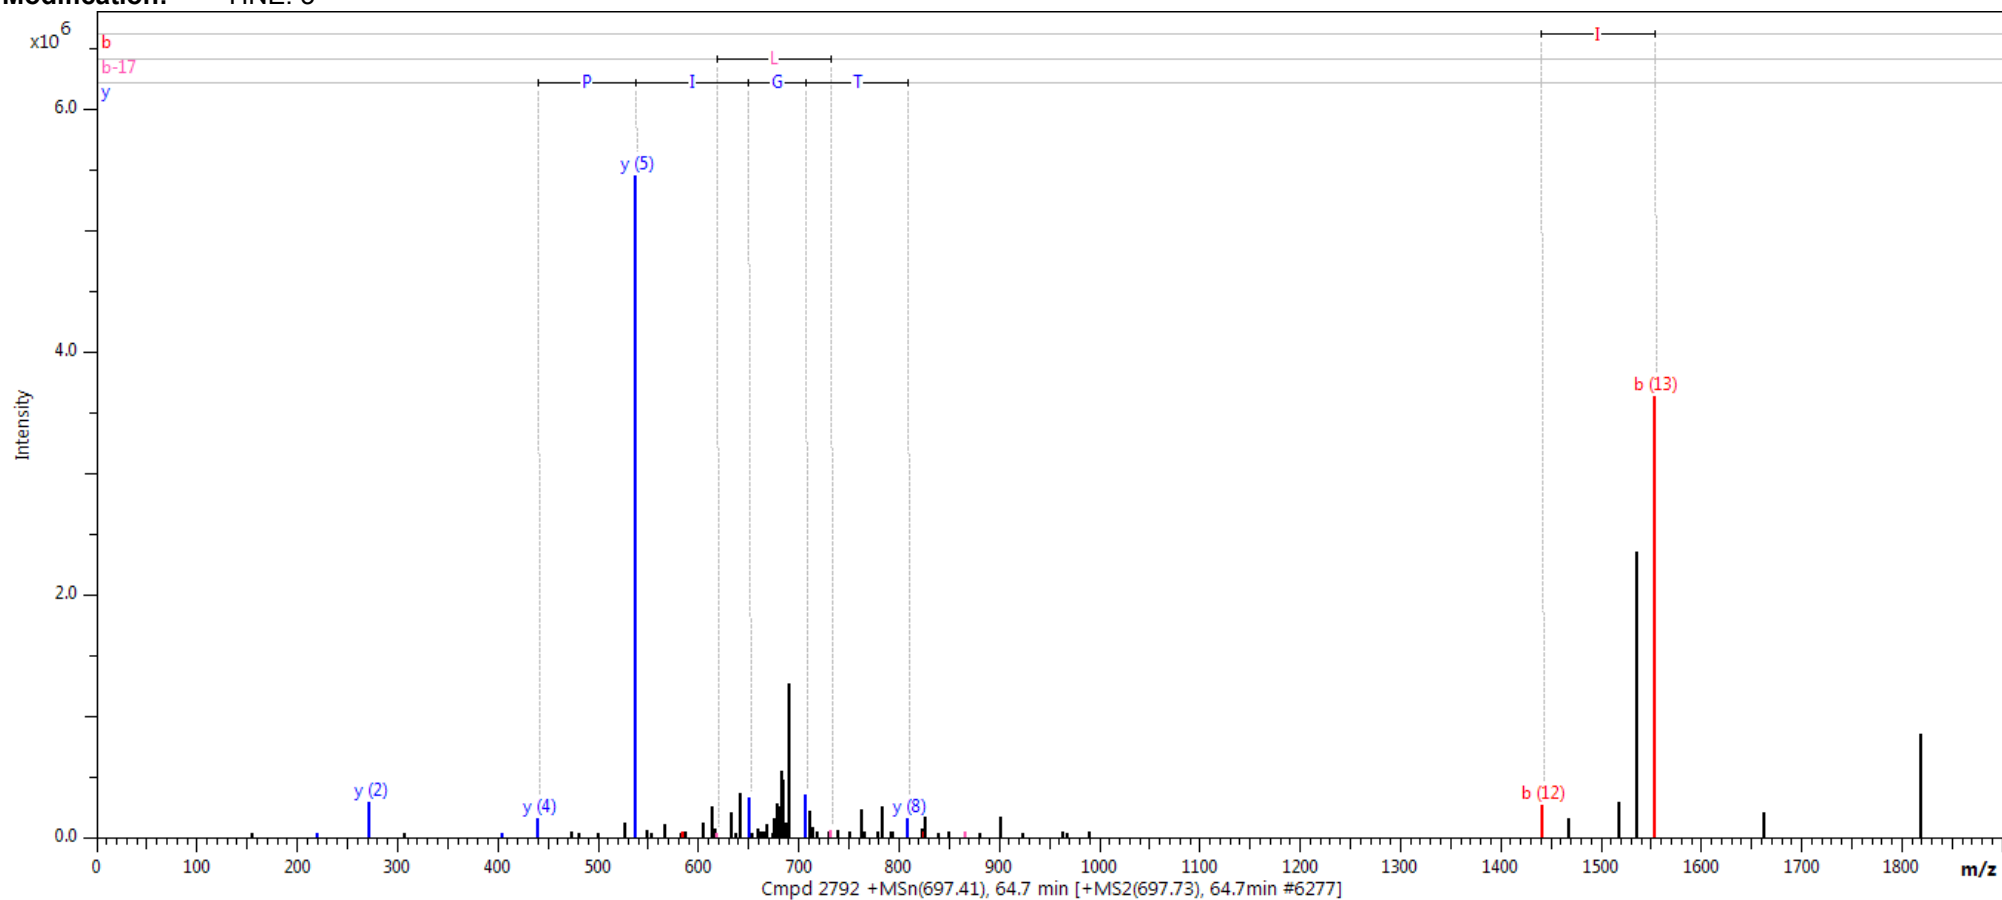

# MSMS Protein Single Report

**Source:** D:/Data/Petersen/013113/Fritz #9\_Tray02-E9\_01\_638.d  
**Protein:** 78 kDa glucose-regulated protein OS=Homo sapiens GN=HSPA5 PE=1 SV=2  
**Accession:** GRP78\_HUMAN **Parent m/z:** 601.97, 3+  
**Sequence:** K.LGGKLSSEDKETMEK.A **Score:** 43.88

**Modification:** Oxidation: 13; 4-ONE+Delta:H(-2)O(-1): 4

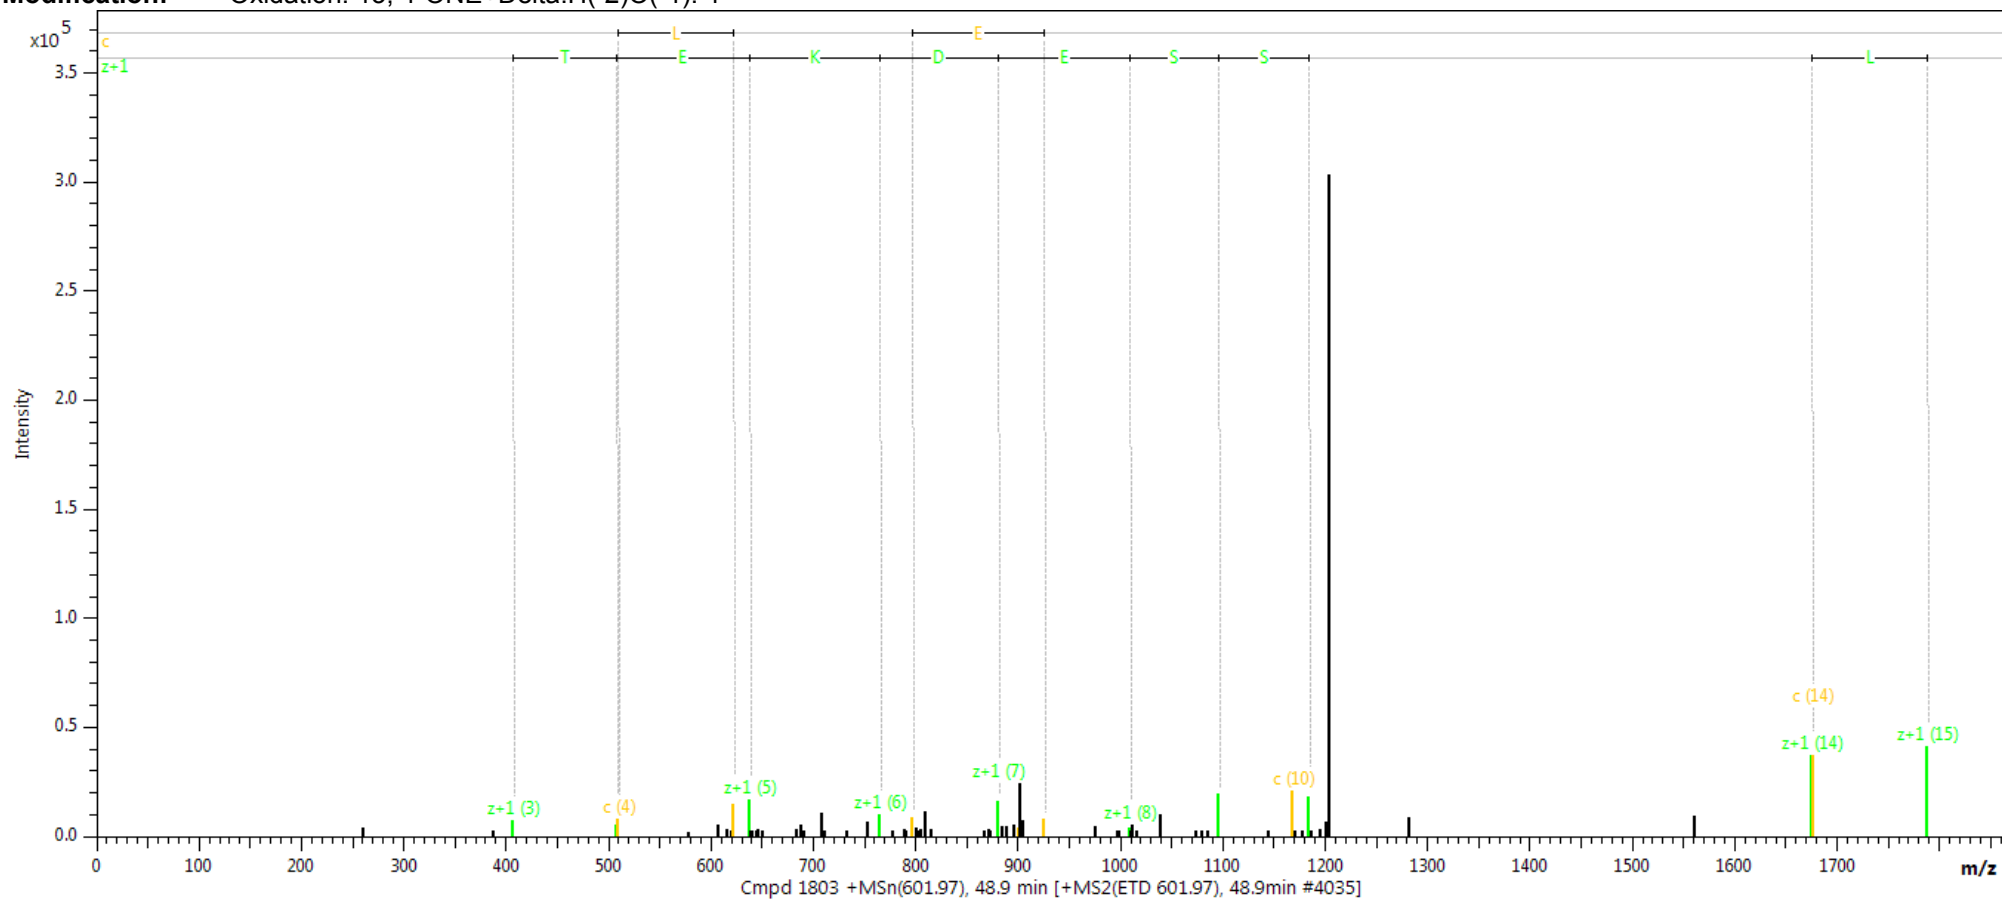

# MSMS Protein Single Report

**Source:** D:/Data/Petersen/013113/Fritz #11\_Tray02-F2\_01\_640.d  
**Protein:** 78 kDa glucose-regulated protein OS=Homo sapiens GN=HSPA5 PE=1 SV=2  
**Accession:** GRP78\_HUMAN **Parent m/z:** 711.69, 3+  
**Sequence:** K.IEWLESHQDADIEDFK.A **Score:** 42.08

**Modification:** HNE+Delta:H(2): 7

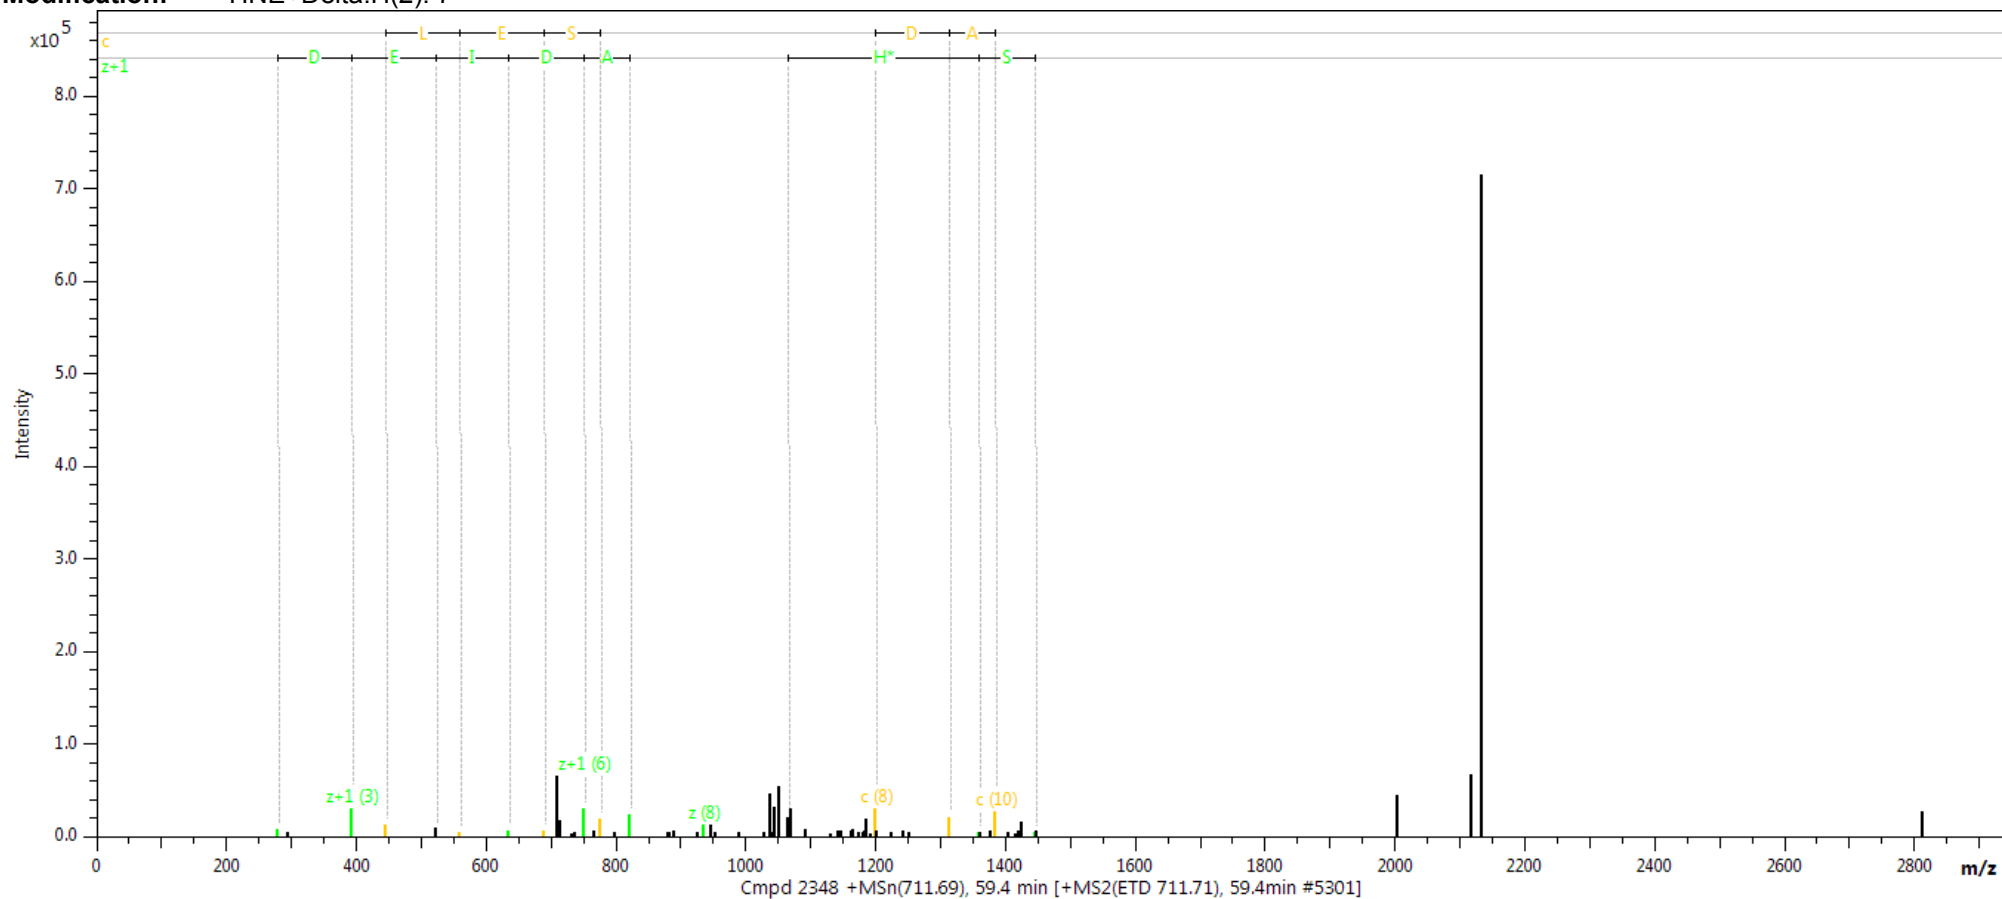

# MSMS Protein Single Report

**Source:** D:/Data/Petersen/022813/GRP78 HNE trypsin\_Tray02-C1\_01\_749.d  
**Protein:** 78 kDa glucose-regulated protein OS=Homo sapiens GN=HSPA5 PE=1 SV=2  
**Accession:** GRP78\_HUMAN **Parent m/z:** 711.04, 3+  
**Sequence:** K.IEWLESHQDADIEDFK.A **Score:** 32.38

**Modification:** HNE: 7

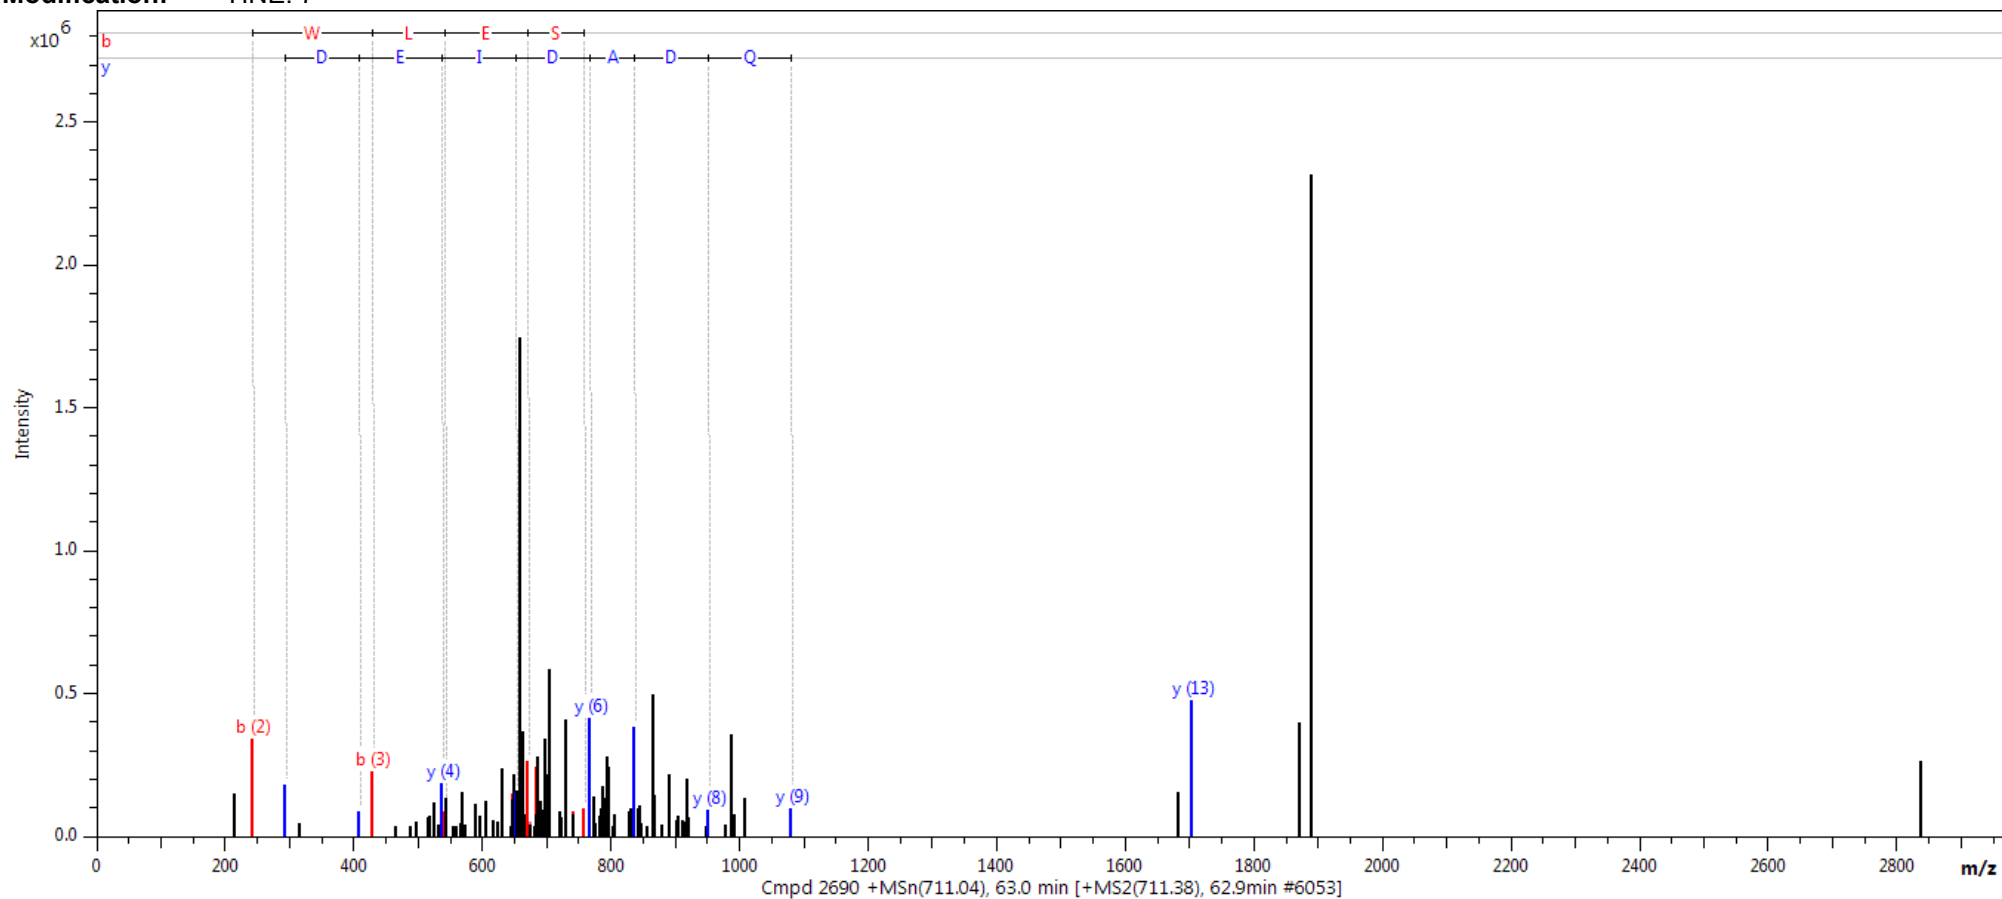

# MSMS Protein Single Report

**Source:** D:/Data/Petersen/022813/GRP78 HNEred trypsin\_Tray02-C2\_01\_750.d  
**Protein:** 78 kDa glucose-regulated protein OS=Homo sapiens GN=HSPA5 PE=1 SV=2  
**Accession:** GRP78\_HUMAN **Parent m/z:** 711.74, 3+  
**Sequence:** K.IEWLESHQDADIEDFK.A **Score:** 21.47

**Modification:** HNE+Delta:H(2): 7

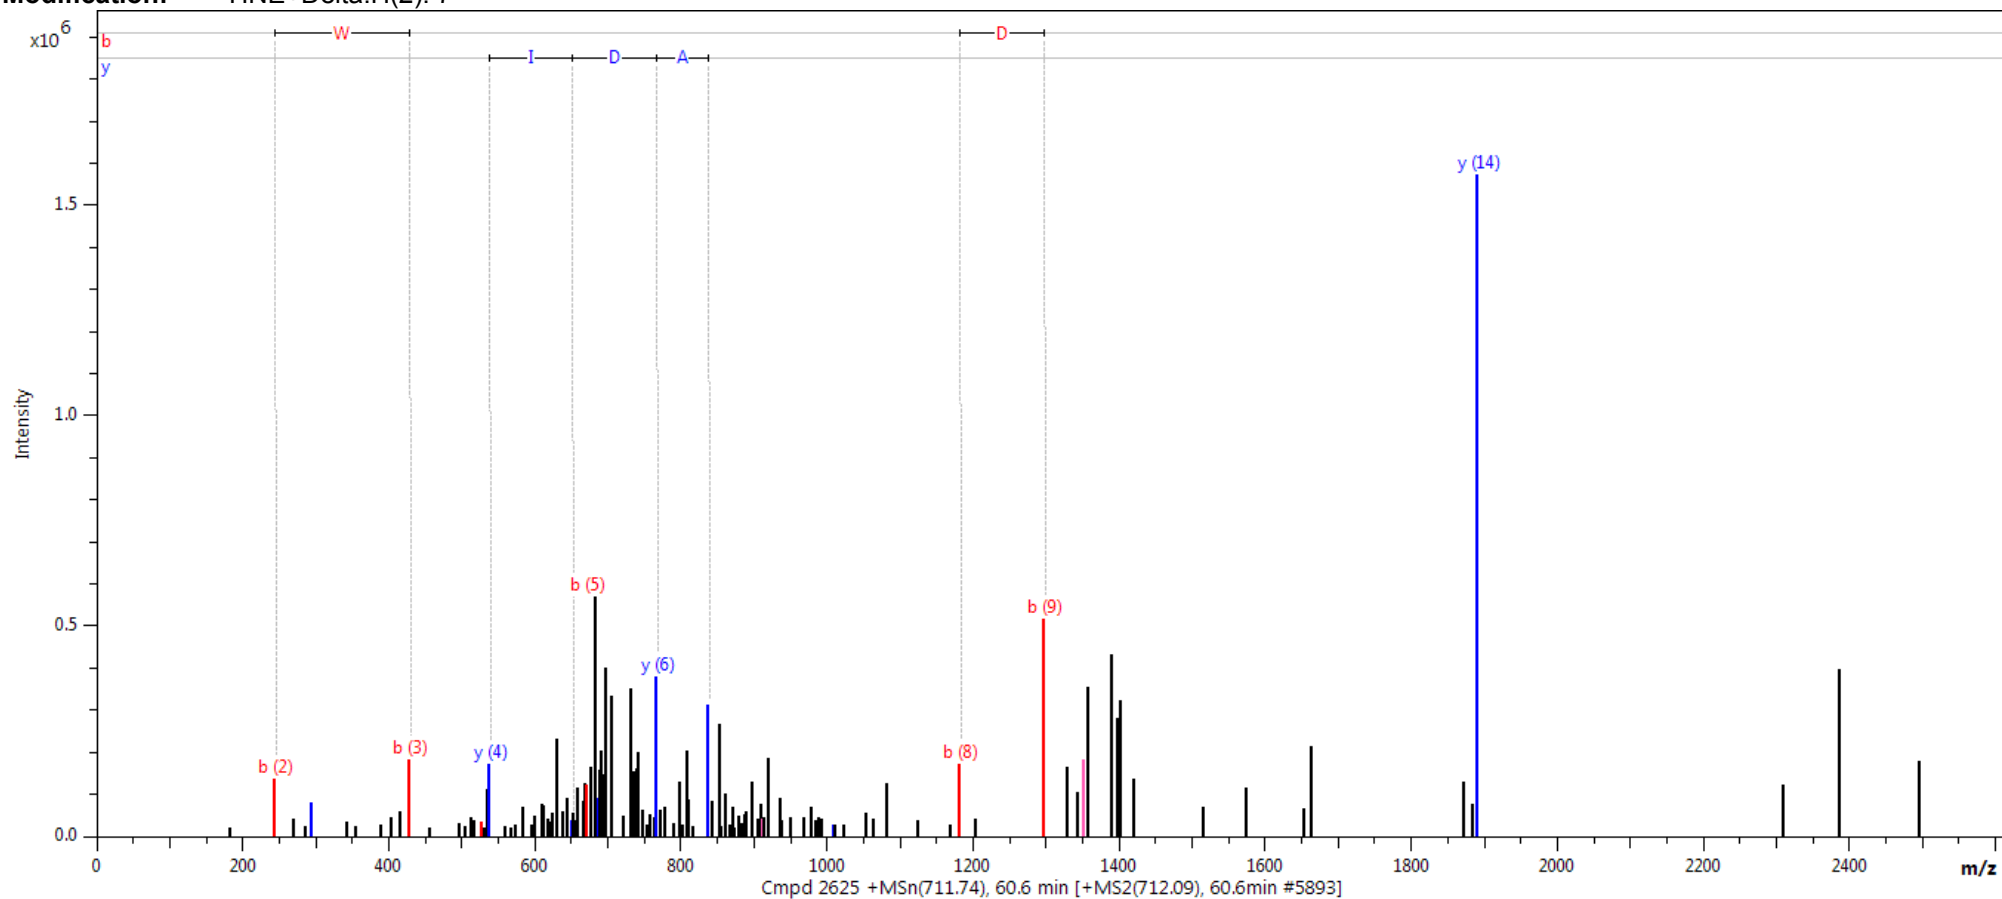

# MSMS Protein Single Report

**Source:** D:/Data/Petersen/022813/GRP78 HNE trypsin\_Tray02-C1\_01\_749.d  
**Protein:** 78 kDa glucose-regulated protein OS=Homo sapiens GN=HSPA5 PE=1 SV=2  
**Accession:** GRP78\_HUMAN **Parent m/z:** 561.38, 3+  
**Sequence:** K.KELEEIVQPIISK.L **Score:** 53.37

**Modification:** HNE: 1

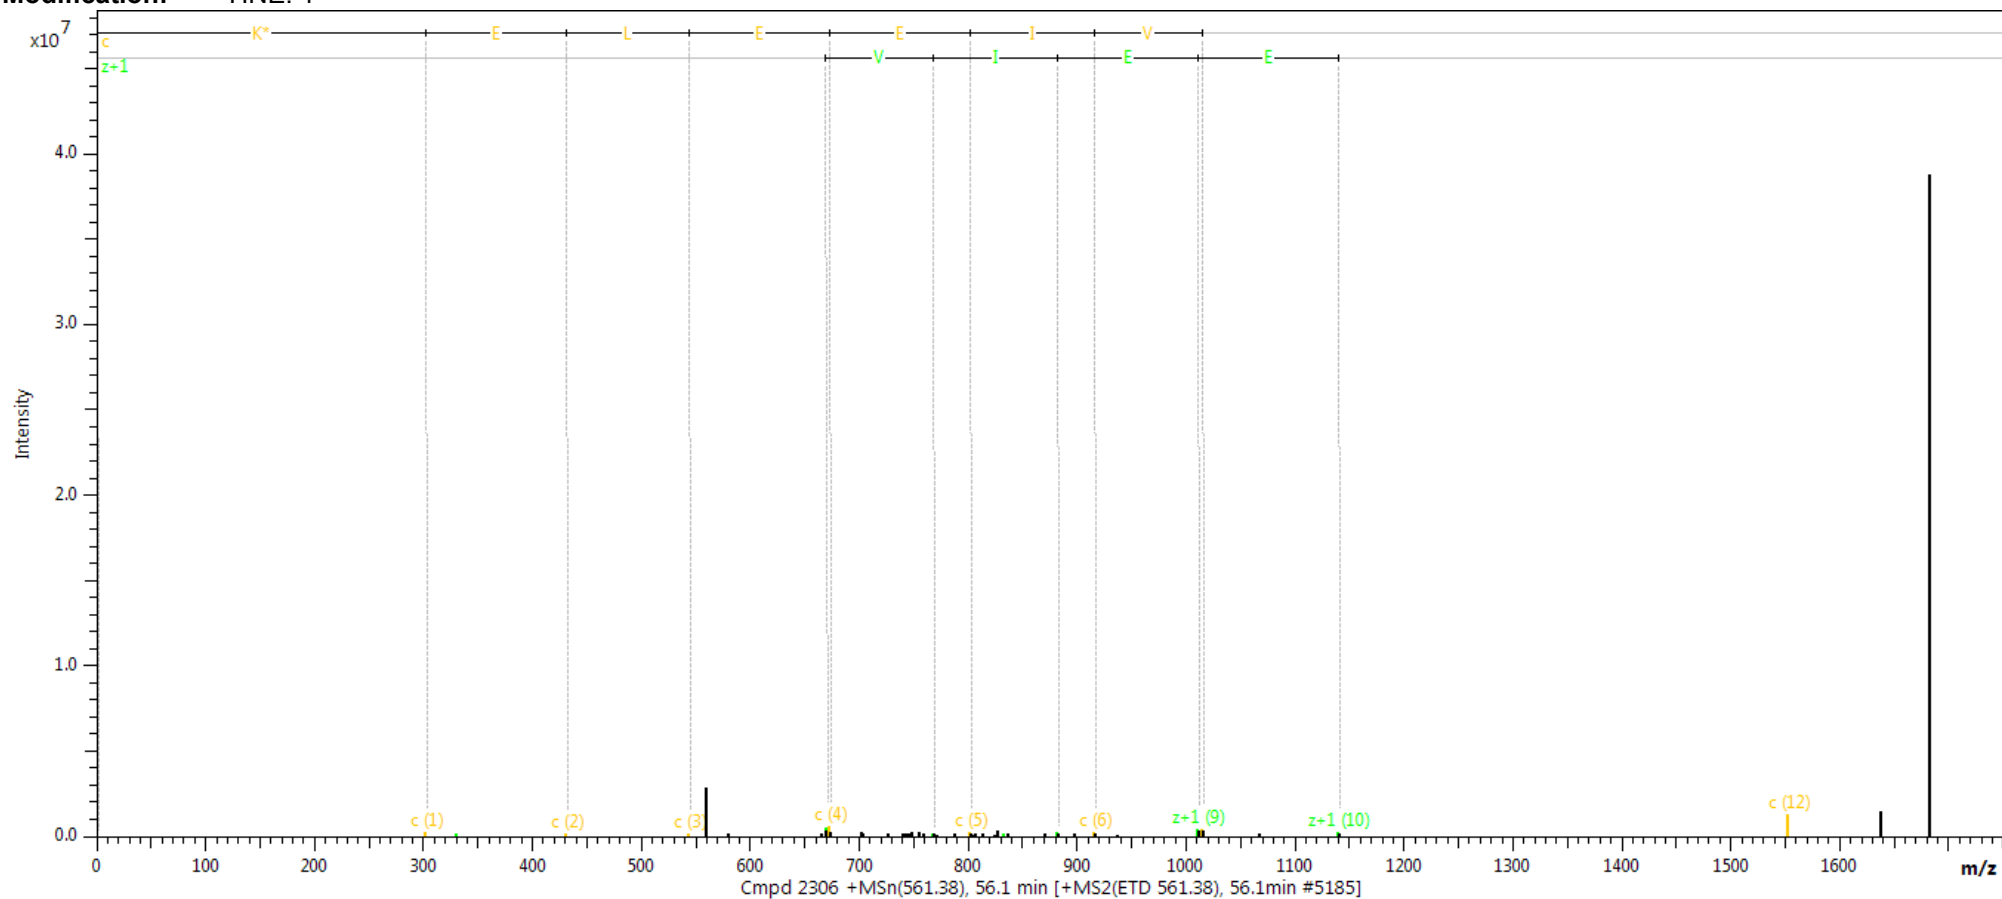

Supplement: NIHMS610946-supplement-01.pdf [file NIHMS610946-supplement-01.pdf]
